# Supplementary material for: Energetic productivity dynamics of global super-giant oilfields
Source: Royal Society of Chemistry journal article supplement (doi:10.1039/c7ee01031a), 2017-01-01
Supplement: c7ee01031a1.xlsx [file c7ee01031a1.xlsx]

## Sheet: Agbami
1 Inputs
Variables				Unit	Field 1	Field 2	Field 3	Field 4	Field 5	Field 6	Field 7	Field 8
1.1 Production methods
Notes: Enter "1" where applicable and "0" where not applicable
	1.1.1 Downhole pump			NA	0	0	0	0	0	0	0	0
	1.1.2 Water reinjection			NA	0	0	0	0	0	0	0	0
	1.1.3 Natural gas reinjection			NA	1	1	1	1	1	1	1	1
	1.1.4 Water flooding			NA	0	0	0	0	0	0	0	0
	1.1.5 Gas lifting			NA	0	0	0	0	0	0	0	0
	1.1.6 Gas flooding			NA	0	0	0	0	0	0	0	0
	1.1.7 Steam flooding			NA	0	0	0	0	0	0	0	0
	1.1.8 Oil sands mine (integrated with upgrader)			NA	0	0	0	0	0	0	0	0
	1.1.9 Oil sands mine (non-integrated with upgrader)			NA	0	0	0	0	0	0	0	0
1.2 Field properties
	1.2.1 Field location (Country)			NA	Nigeria	Nigeria	Nigeria	Nigeria	Nigeria	Nigeria	Nigeria	Nigeria
	1.2.2 Field name			NA	Agbami 2008	Agbami 2009	Agbami 2010	Agbami 2011	Agbami 2012	Agbami 2013	Agbami 2014	Agbami 2015
	1.2.3 Field age			yr.	1	2	3	4	5	6	7	8
	1.2.4 Field depth			ft	10300	10300	10300	10300	10300	10300	10300	10300
	1.2.5 Oil production volume			bbl/d	41002.9	204167	238820	241930	232992	232524	239124	233807
	1.2.6 Number of producing wells			[-]	8	15	26	26	28	28	31	39
	1.2.7 Number of water injecting wells			[-]
	1.2.8 Well diameter			in	4.5	4.5	4.5	4.5	4.5	4.5	4.5	4.5
	1.2.9 Productivity index			bbl/psi-d
	1.2.10 Reservoir pressure			psi	2700	2700	2700	2700	2700	2700	2700	2700
	1.2.11 Reservoir temperature			◦F
	1.2.12 Offshore?			[0-1]	1	1	1	1	1	1	1	1
	1.2.13 New Wells Drilled (Producers or Injectors)			wells
1.3 Fluid properties
	1.3.1 API gravity			deg. API	47	47	47	47	47	47	47	47
	1.3.2 Gas composition
		N2		mol%
		CO2		mol%
		C1		mol%
		C2		mol%
		C3		mol%
		C4+		mol%
		H2S		mol%
1.4 Production practices
Notes: Enter "NA" where not applicable
	1.4.1 Gas-to-oil ratio (GOR)			scf/bbl oil	2157.31	550.718	598.454	750.93	991.14	1096.58	1188.65	1762.05
	1.4.2 Water-to-oil ratio (WOR)			bbl water/bbl oil	0.778941	0.156435	0.133736	0.132017	0.137081	0.137357	0.133566	0.136603
	1.4.3 Water injection ratio			bbl water/bbl oil	0	0	0	0	0	0	0	0
	1.4.4 Gas lifting injection ratio			scf/bbl liquid	0	0	0	0	0	0	0	0
	1.4.5 Gas flooding injection ratio			scf/bbl oil	0	0	0	0	0	0	0	0
	1.4.6 Flood gas			NA
		1= Natural gas
		2= Nitrogen (N2)
		3= Carbon Dioxide (CO2)
		4= Air
		5= Oxygen (O2)
	1.4.7 Carbon dioxide flooding and sequestration parameters
		1.4.7.1 Percentage of newly acquired CO2 (total injected CO2 includes both new and recycled)		%
		1.4.7.2 Source of CO2		NA
			1= Natural subsurface reservoir
			2= Anthropogenic
		1.4.7.3 Percentage of sequestration credit assigned to the oilfield		%
	1.4.8 Steam-to-oil ratio (SOR)			bbl steam/bbl oil
	1.4.9 Fraction of required electricity generated onsite			[-]	1	1	1	1	1	1	1	1
	1.4.10 Fraction of remaining natural gas reinjected			[-]	0.781557	0.759901	0.738845	0.718373	0.698467	0.880462	0.799617	0.832325
	1.4.11 Fraction of water produced that is reinjected			[-]	0	0	0	0	0	0	0	0
	1.4.12 Fraction of steam generation via cogeneration			[-]
1.5 Processing practices
	1.5.1 Heater/treater			NA	0	0	0	0	0	0	0	0
	1.5.2 Stabilizer column			NA	1	1	1	1	1	1	1	1
	1.5.3 Upgrader type				0	0	0	0	0	0	0	0
		0 = None
		1 = Delayed coking
		2 = Hydroconversion
		3 = Combined hydroconversion and fluid coking
	1.5.3 Associated Gas Processing Path			NA	5	5	5	5	5	5	5	5
		1= None
		2= Minimal: Dehydrator
		3= Acid Gas: Dehydrator + Amine Process
		4= Wet Gas: Dehydrator + Demethanizer
		5= Acid Wet Gas: Dehydrator + Amine Process + Demethanizer
		6= CO2-EOR Membrane: Dehydrator + Compressor + Membrane + Amine Process + Demethanizer
		7= CO2-EOR Ryan Holmes: Dehydrator + Ryan Holmes Process (Demethanizer Included)
		Notes: Choose paths 6 or 7 only if gas flooding is ON and CO2 is the flood gas
	1.5.4 Flaring-to-oil ratio			scf/bbl oil	471.116	132.2	156.266	211.46	298.838	75.0311	56.9355	69.3936
	1.5.5 Venting-to-oil ratio			scf/bbl oil
	1.5.6 Volume fraction of diluent			[-]
1.6 Land use impacts
	1.6.1 Crude ecosystem carbon richness
		1.6.1.1 Low carbon richness (semi-arid grasslands)		NA	1	1	1	1	1	1	1	1
		1.6.1.2 Moderate carbon richness (mixed)		NA	0	0	0	0	0	0	0	0
		1.6.1.3 High carbon richness (forested)		NA	0	0	0	0	0	0	0	0
	1.6.2 Field development intensity
		1.6.2.1 Low intensity development and low oxidation		NA	1	1	1	1	1	1	1	1
		1.6.2.2 Moderate intensity development and moderate oxidation		NA	0	0	0	0	0	0	0	0
		1.6.2.3 High intensity development and high oxidation		NA	0	0	0	0	0	0	0	0
1.8 Crude oil transport
	1.8.1 Fraction of oil transported by each mode
		1.8.1.1 Ocean tanker		[-]	1	1	1	1	1	1	1	1
		1.8.1.2 Barge		[-]	0	0	0	0	0	0	0	0
		1.8.1.3 Pipeline		[-]	0	0	0	0	0	0	0	0
		1.8.1.4 Rail		[-]	0	0	0	0	0	0	0	0
		1.8.1.5 Truck			0	0	0	0	0	0	0	0
	1.8.2 Transport distance (one way)
		1.8.2.1 Ocean tanker		Mile	6220	6220	6220	6220	6220	6220	6220	6220
		1.8.2.2 Barge		Mile	0	0	0	0	0	0	0	0
		1.8.2.3 Pipeline		Mile	0	0	0	0	0	0	0	0
		1.8.2.4 Rail		Mile	0	0	0	0	0	0	0	0
		1.8.2.5 Truck			0	0	0	0	0	0	0	0
	1.8.3 Ocean tanker size, if applicable			Ton
1.9 Small sources emissions				gCO2eq/MJ

## Sheet: Brent
1 Inputs
Variables				Unit	Field 1	Field 2	Field 3	Field 4	Field 5	Field 6	Field 7	Field 8	Field 9	Field 10	Field 11	Field 12	Field 13	Field 14	Field 15	Field 16	Field 17	Field 18	Field 19	Field 20	Field 21	Field 22	Field 23	Field 24	Field 25	Field 26	Field 27	Field 28	Field 29	Field 30	Field 31	Field 32	Field 33	Field 34	Field 35	Field 36	Field 37	Field 38	Field 39	Field 40
1.1 Production methods
Notes: Enter "1" where applicable and "0" where not applicable
	1.1.1 Downhole pump			NA	1	1	0	0	0	0	0	0	0	0	0	0	0	0	0	0	0	0	0	0	0	0	0	0	0	0	0	0	0	0	0	0	0	0	0	0	0	0	0	0
	1.1.2 Water reinjection			NA	0	0	0	0	0	0	0	0	0	0	0	0	0	0	0	0	0	0	0	0	0	1	1	1	1	1	1	1	1	1	1	1	1	1	1	1	1	1	1	1
	1.1.3 Natural gas reinjection			NA	0	0	1	1	1	1	1	1	1	1	1	1	1	1	1	1	0	0	1	0	1	0	1	1	1	1	1	1	1	1	1	1	1	1	1	1	1	1	1	1
	1.1.4 Water flooding			NA	0	0	0	1	1	1	1	1	1	1	1	1	1	1	1	1	1	1	1	1	1	0	0	0	0	0	0	0	0	0	0	0	0	0	0	0	0	0	0	0
	1.1.5 Gas lifting			NA	0	0	0	0	0	0	0	0	0	0	0	0	0	0	0	0	0	0	0	0	0	0	0	0	0	0	0	0	0	0	0	0	0	0	0	0	0	0	0	0
	1.1.6 Gas flooding			NA	0	0	0	0	0	0	0	0	0	0	0	0	0	0	0	0	1	1	0	0	0	0	0	0	0	0	0	0	0	0	0	0	0	0	0	0	0	0	0	0
	1.1.7 Steam flooding			NA	0	0	0	0	0	0	0	0	0	0	0	0	0	0	0	0	0	0	0	0	0	0	0	0	0	0	0	0	0	0	0	0	0	0	0	0	0	0	0	0
	1.1.8 Oil sands mine (integrated with upgrader)			NA	0	0	0	0	0	0	0	0	0	0	0	0	0	0	0	0	0	0	0	0	0	0	0	0	0	0	0	0	0	0	0	0	0	0	0	0	0	0	0	0
	1.1.9 Oil sands mine (non-integrated with upgrader)			NA	0	0	0	0	0	0	0	0	0	0	0	0	0	0	0	0	0	0	0	0	0	0	0	0	0	0	0	0	0	0	0	0	0	0	0	0	0	0	0	0
1.2 Field properties
	1.2.1 Field location (Country)			NA	United Kingdom	United Kingdom	United Kingdom	United Kingdom	United Kingdom	United Kingdom	United Kingdom	United Kingdom	United Kingdom	United Kingdom	United Kingdom	United Kingdom	United Kingdom	United Kingdom	United Kingdom	United Kingdom	United Kingdom	United Kingdom	United Kingdom	United Kingdom	United Kingdom	United Kingdom	United Kingdom	United Kingdom	United Kingdom	United Kingdom	United Kingdom	United Kingdom	United Kingdom	United Kingdom	United Kingdom	United Kingdom	United Kingdom	United Kingdom	United Kingdom	United Kingdom	United Kingdom	United Kingdom	United Kingdom	United Kingdom
	1.2.2 Field name			NA	Brent 1976	Brent 1977	Brent 1978	Brent 1979	Brent 1980	Brent 1981	Brent 1982	Brent 1983	Brent 1984	Brent 1985	Brent 1986	Brent 1987	Brent 1988	Brent 1989	Brent 1990	Brent 1991	Brent 1992	Brent 1993	Brent 1994	Brent 1995	Brent 1996	Brent 1997	Brent 1998	Brent 1999	Brent 2000	Brent 2001	Brent 2002	Brent 2003	Brent 2004	Brent 2005	Brent 2006	Brent 2007	Brent 2008	Brent 2009	Brent 2010	Brent 2011	Brent 2012	Brent 2013	Brent 2014	Brent 2015
	1.2.3 Field age			yr.	1	2	3	4	5	6	7	8	9	10	11	12	13	14	15	16	17	18	19	20	21	22	23	24	25	26	27	28	29	30	31	32	33	34	35	36	37	38	39	40
	1.2.4 Field depth			ft	8200	8200	8200	8200	8200	8200	8200	8200	8200	8200	8200	8200	8200	8200	8200	8200	8200	8200	8200	8200	8200	8200	8200	8200	8200	8200	8200	8200	8200	8200	8200	8200	8200	8200	8200	8200	8200	8200	8200	8200
	1.2.5 Oil production volume			bbl/d	2449.91	25970.5	79307	178869	140077	230473	323324	400011	427346	423778	393707	385752	342301	202624	75750.5	183005	233839	236172	205613	195110	199917	132752	128513	96803.4	75942.8	61860.7	45428.8	24582.8	16768.9	10387.6	8658.14	7213.16	7166.2	6696.79	6629.94	2034.19	1029.62	1386.6	1267.94	369.789
	1.2.6 Number of producing wells			[-]	3	5	15	29	41	57	77	96	108	115	119	128	94	105	102	107	152	154	149	155	132	136	147	150	147	143.054	139.208	135.361	131.515	127.669	123.823	119.977	116.13	112.284	108.438	104.592	100.746	96.8994	93.0532	89.207
	1.2.7 Number of water injecting wells			[-]	0	0	1	10	21	29	36	44	47	49	50	52	55	56	59	59	64	62	60	61	53	56	59	59	57	57	57	57	57	57	57	57	57	57	57	57	57	57	57	57
	1.2.8 Well diameter			in	4.5	4.5	4.5	4.5	4.5	4.5	4.5	4.5	4.5	4.5	4.5	4.5	4.5	4.5	4.5	4.5	4.5	4.5	4.5	4.5	4.5	4.5	4.5	4.5	4.5	4.5	4.5	4.5	4.5	4.5	4.5	4.5	4.5	4.5	4.5	4.5	4.5	4.5	4.5	4.5
	1.2.9 Productivity index			bbl/psi-d	50	50	50	50	50	50	50	50	50	50	50	50	50	50	50	50	50	50	50	50	50	50	50	50	50	50	50	50	50	50	50	50	50	50	50	50	50	50	50	50
	1.2.10 Reservoir pressure			psi	5785	5792.61	5699.33	5673.06	5139.11	5377.7	5403.03	5395.12	5431.55	5660.07	5676.69	5628.47	5591.58	5630.18	5451.32	5412.42	5459.49	5376.65	5215.38	5109.65	5046.93	4998.67	4614.41	3848.61	3608.15	2916.82	2450.58	2126.33	1830.83	1648.99	1428.39	1301.6	1211.88	1189.58	1158.56	1158.56	1158.56	1158.56	1158.56	1158.56
	1.2.11 Reservoir temperature			◦F	204	204	204	204	204	204	204	204	204	204	204	204	204	204	204	204	204	204	204	204	204	204	204	204	204	204	204	204	204	204	204	204	204	204	204	204	204	204	204	204
	1.2.12 Offshore?			[0-1]	1	1	1	1	1	1	1	1	1	1	1	1	1	1	1	1	1	1	1	1	1	1	1	1	1	1	1	1	1	1	1	1	1	1	1	1	1	1	1	1
	1.2.13 New Wells Drilled (Producers or Injectors)			wells
1.3 Fluid properties
	1.3.1 API gravity			deg. API	37.5	37.5	37.5	37.5	37.5	37.5	37.5	37.5	37.5	37.5	37.5	37.5	37.5	37.5	37.5	37.5	37.5	37.5	37.5	37.5	37.5	37.5	37.5	37.5	37.5	37.5	37.5	37.5	37.5	37.5	37.5	37.5	37.5	37.5	37.5	37.5	37.5	37.5	37.5	37.5
	1.3.2 Gas composition
		N2		mol%	1.51	1.51	1.51	1.51	1.51	1.51	1.51	1.51	1.51	1.51	1.51	1.51	1.51	1.51	1.51	1.51	1.51	1.51	1.51	1.51	1.51	1.51	1.51	1.51	1.51	1.51	1.51	1.51	1.51	1.51	1.51	1.51	1.51	1.51	1.51	1.51	1.51	1.51	1.51	1.51
		CO2		mol%	11.03	11.03	11.03	11.03	11.03	11.03	11.03	11.03	11.03	11.03	11.03	11.03	11.03	11.03	11.03	11.03	11.03	11.03	11.03	11.03	11.03	11.03	11.03	11.03	11.03	11.03	11.03	11.03	11.03	11.03	11.03	11.03	11.03	11.03	11.03	11.03	11.03	11.03	11.03	11.03
		C1		mol%	70.87	70.87	70.87	70.87	70.87	70.87	70.87	70.87	70.87	70.87	70.87	70.87	70.87	70.87	70.87	70.87	70.87	70.87	70.87	70.87	70.87	70.87	70.87	70.87	70.87	70.87	70.87	70.87	70.87	70.87	70.87	70.87	70.87	70.87	70.87	70.87	70.87	70.87	70.87	70.87
		C2		mol%	10.26	10.26	10.26	10.26	10.26	10.26	10.26	10.26	10.26	10.26	10.26	10.26	10.26	10.26	10.26	10.26	10.26	10.26	10.26	10.26	10.26	10.26	10.26	10.26	10.26	10.26	10.26	10.26	10.26	10.26	10.26	10.26	10.26	10.26	10.26	10.26	10.26	10.26	10.26	10.26
		C3		mol%	3.38	3.38	3.38	3.38	3.38	3.38	3.38	3.38	3.38	3.38	3.38	3.38	3.38	3.38	3.38	3.38	3.38	3.38	3.38	3.38	3.38	3.38	3.38	3.38	3.38	3.38	3.38	3.38	3.38	3.38	3.38	3.38	3.38	3.38	3.38	3.38	3.38	3.38	3.38	3.38
		C4+		mol%	2.95	2.95	2.95	2.95	2.95	2.95	2.95	2.95	2.95	2.95	2.95	2.95	2.95	2.95	2.95	2.95	2.95	2.95	2.95	2.95	2.95	2.95	2.95	2.95	2.95	2.95	2.95	2.95	2.95	2.95	2.95	2.95	2.95	2.95	2.95	2.95	2.95	2.95	2.95	2.95
		H2S		mol%	0	0	0	0	0	0	0	0	0	0	0	0	0	0	0	0	0	0	0	0	0	0	0	0	0	0	0	0	0	0	0	0	0	0	0	0	0	0	0	0
1.4 Production practices
Notes: Enter "NA" where not applicable
	1.4.1 Gas-to-oil ratio (GOR)			scf/bbl oil	1433.1	1979.1	2003.07	1870.81	1766.75	1833.78	1928.28	1926.34	1893.02	1924.76	2081.56	2236.08	2399.74	2867.78	3436.53	3032.09	3143.51	3029.74	3147.62	3206.32	3264.85	4762.36	5914.37	9004.56	12063.8	16105	19972.6	22219.6	25828.4	26090.3	28923.3	22887.7	24598	19959.9	19353.1	16831.5	23268.3	35877.9	20393.2	34791.1
	1.4.2 Water-to-oil ratio (WOR)			bbl water/bbl oil	0	0	0.00240536	0.0191202	0.0842696	0.0624779	0.124936	0.101285	0.130957	0.292652	0.483462	0.608692	0.622015	0.666447	0.696203	0.60547	0.884885	0.969701	1.0526	1.09401	1.37062	2.94212	3.86579	6.05053	7.0101	8.38408	7.33249	13.9437	20.048	21.3255	18.7522	17.5166	20.6666	19.1168	22.9586	17.1925	25.3493	28.869	24.9318	93.8083
	1.4.3 Water injection ratio			bbl water/bbl oil	0	0	0	0.0468454	1.65722	1.36488	1.48005	1.88478	1.9469	2.05972	2.18112	2.23989	2.50973	2.32093	2.67192	2.02797	3.03899	3.56129	3.658	2.90333	2.15941	0.612837	0.670992	0.902648	0.103349	0.126876	0.172768	0.319274	0.468049	0.755578	0.906505	1.0881	1.09523	1.172	1.18382	3.85836	7.62289	5.66035	6.19008	21.2247
	1.4.4 Gas lifting injection ratio			scf/bbl liquid
	1.4.5 Gas flooding injection ratio			scf/bbl oil																	17096.5	8036.59
	1.4.6 Flood gas			NA																	1	1
		1= Natural gas
		2= Nitrogen (N2)
		3= Carbon Dioxide (CO2)
		4= Air
		5= Oxygen (O2)
	1.4.7 Carbon dioxide flooding and sequestration parameters
		1.4.7.1 Percentage of newly acquired CO2 (total injected CO2 includes both new and recycled)		%
		1.4.7.2 Source of CO2		NA
			1= Natural subsurface reservoir
			2= Anthropogenic
		1.4.7.3 Percentage of sequestration credit assigned to the oilfield		%
	1.4.8 Steam-to-oil ratio (SOR)			bbl steam/bbl oil
	1.4.9 Fraction of required electricity generated onsite			[-]	1	1	1	1	1	1	1	1	1	1	1	1	1	1	1	1	1	1	1	1	1	1	1	1	1	1	1	1	1	1	1	1	1	1	1	1	1	1	1	1
	1.4.10 Fraction of remaining natural gas reinjected			[-]	0	0	0.0139461	0.0172581	0.414652	0.655284	0.385495	0.279412	0.303176	0.238382	0.277606	0.25829	0.195777	0.042018	0.0697166	0.116303	1	1	0.0112765	0	0.0597831	0	0.0625069	0.107231	0.00270247	0.00248517	0.00272878	0.00453279	0.00571651	0.00913563	0.00988691	0.014997	0.0140457	0.0185229	0.0192962	0.0723131	0.103346	0.0497684	0.095752	0.192447
	1.4.11 Fraction of water produced that is reinjected			[-]	0	0	0	1	1	1	1	1	1	1	1	1	1	1	1	1	1	1	1	1	1	0.208298	0.173572	0.149185	0.0147429	0.015133	0.023562	0.0228973	0.0233464	0.0354307	0.0483413	0.0621185	0.0529953	0.0613073	0.0515633	0.224421	0.300714	0.19607	0.24828	0.226256
	1.4.12 Fraction of steam generation via cogeneration			[-]
1.5 Processing practices
	1.5.1 Heater/treater			NA	0	0	0	0	0	0	0	0	0	0	0	0	0	0	0	0	0	0	0	0	0	0	0	0	0	0	0	0	0	0	0	0	0	0	0	0	0	0	0	0
	1.5.2 Stabilizer column			NA	1	1	1	1	1	1	1	1	1	1	1	1	1	1	1	1	1	1	1	1	1	1	1	1	1	1	1	1	1	1	1	1	1	1	1	1	1	1	1	1
	1.5.3 Upgrader type				0	0	0	0	0	0	0	0	0	0	0	0	0	0	0	0	0	0	0	0	0	0	0	0	0	0	0	0	0	0	0	0	0	0	0	0	0	0	0	0
		0 = None
		1 = Delayed coking
		2 = Hydroconversion
		3 = Combined hydroconversion and fluid coking
	1.5.3 Associated Gas Processing Path			NA
		1= None
		2= Minimal: Dehydrator
		3= Acid Gas: Dehydrator + Amine Process
		4= Wet Gas: Dehydrator + Demethanizer
		5= Acid Wet Gas: Dehydrator + Amine Process + Demethanizer
		6= CO2-EOR Membrane: Dehydrator + Compressor + Membrane + Amine Process + Demethanizer
		7= CO2-EOR Ryan Holmes: Dehydrator + Ryan Holmes Process (Demethanizer Included)
		Notes: Choose paths 6 or 7 only if gas flooding is ON and CO2 is the flood gas
	1.5.4 Flaring-to-oil ratio			scf/bbl oil	0.648595	0.79792	0.981624	1.20762	1.48565	1.82769	2.24848	2.76614	3.40299	4.18645	5.15029	6.33604	7.79477	9.58935	11.7971	14.5131	17.8545	21.9651	27.0221	33.2433	40.8969	55.8641	71.4467	94.8501	102.304	119.884	124.378	201.118	294.835	475.957	571.029	489.587	542.075	685.539	585.92	1909.66	685.977	1324.71	1963.45	2096.14
	1.5.5 Venting-to-oil ratio			scf/bbl oil
	1.5.6 Volume fraction of diluent			[-]
1.6 Land use impacts
	1.6.1 Crude ecosystem carbon richness
		1.6.1.1 Low carbon richness (semi-arid grasslands)		NA	1	1	1	1	1	1	1	1	1	1	1	1	1	1	1	1	1	1	1	1	1	1	1	1	1	1	1	1	1	1	1	1	1	1	1	1	1	1	1	1
		1.6.1.2 Moderate carbon richness (mixed)		NA	0	0	0	0	0	0	0	0	0	0	0	0	0	0	0	0	0	0	0	0	0	0	0	0	0	0	0	0	0	0	0	0	0	0	0	0	0	0	0	0
		1.6.1.3 High carbon richness (forested)		NA	0	0	0	0	0	0	0	0	0	0	0	0	0	0	0	0	0	0	0	0	0	0	0	0	0	0	0	0	0	0	0	0	0	0	0	0	0	0	0	0
	1.6.2 Field development intensity
		1.6.2.1 Low intensity development and low oxidation		NA	1	1	1	1	1	1	1	1	1	1	1	1	1	1	1	1	1	1	1	1	1	1	1	1	1	1	1	1	1	1	1	1	1	1	1	1	1	1	1	1
		1.6.2.2 Moderate intensity development and moderate oxidation		NA	0	0	0	0	0	0	0	0	0	0	0	0	0	0	0	0	0	0	0	0	0	0	0	0	0	0	0	0	0	0	0	0	0	0	0	0	0	0	0	0
		1.6.2.3 High intensity development and high oxidation		NA	0	0	0	0	0	0	0	0	0	0	0	0	0	0	0	0	0	0	0	0	0	0	0	0	0	0	0	0	0	0	0	0	0	0	0	0	0	0	0	0
1.8 Crude oil transport
	1.8.1 Fraction of oil transported by each mode
		1.8.1.1 Ocean tanker		[-]	1	1	1	1	1	1	1	1	1	1	1	1	1	1	1	1	1	1	1	1	1	1	1	1	1	1	1	1	1	1	1	1	1	1	1	1	1	1	1	1
		1.8.1.2 Barge		[-]	0	0	0	0	0	0	0	0	0	0	0	0	0	0	0	0	0	0	0	0	0	0	0	0	0	0	0	0	0	0	0	0	0	0	0	0	0	0	0	0
		1.8.1.3 Pipeline		[-]	0	0	0	0	0	0	0	0	0	0	0	0	0	0	0	0	0	0	0	0	0	0	0	0	0	0	0	0	0	0	0	0	0	0	0	0	0	0	0	0
		1.8.1.4 Rail		[-]	0	0	0	0	0	0	0	0	0	0	0	0	0	0	0	0	0	0	0	0	0	0	0	0	0	0	0	0	0	0	0	0	0	0	0	0	0	0	0	0
		1.8.1.5 Truck			0	0	0	0	0	0	0	0	0	0	0	0	0	0	0	0	0	0	0	0	0	0	0	0	0	0	0	0	0	0	0	0	0	0	0	0	0	0	0	0
	1.8.2 Transport distance (one way)
		1.8.2.1 Ocean tanker		Mile	4778	4778	4778	4778	4778	4778	4778	4778	4778	4778	4778	4778	4778	4778	4778	4778	4778	4778	4778	4778	4778	4778	4778	4778	4778	4778	4778	4778	4778	4778	4778	4778	4778	4778	4778	4778	4778	4778	4778	4778
		1.8.2.2 Barge		Mile	0	0	0	0	0	0	0	0	0	0	0	0	0	0	0	0	0	0	0	0	0	0	0	0	0	0	0	0	0	0	0	0	0	0	0	0	0	0	0	0
		1.8.2.3 Pipeline		Mile	0	0	0	0	0	0	0	0	0	0	0	0	0	0	0	0	0	0	0	0	0	0	0	0	0	0	0	0	0	0	0	0	0	0	0	0	0	0	0	0
		1.8.2.4 Rail		Mile	0	0	0	0	0	0	0	0	0	0	0	0	0	0	0	0	0	0	0	0	0	0	0	0	0	0	0	0	0	0	0	0	0	0	0	0	0	0	0	0
		1.8.2.5 Truck			0	0	0	0	0	0	0	0	0	0	0	0	0	0	0	0	0	0	0	0	0	0	0	0	0	0	0	0	0	0	0	0	0	0	0	0	0	0	0	0
	1.8.3 Ocean tanker size, if applicable			Ton
1.9 Small sources emissions				gCO2eq/MJ

## Sheet: Cantarell - Free flow
1 Inputs
Variables				Unit	Field 1	Field 2	Field 3	Field 4	Field 5	Field 6	Field 7	Field 8	Field 9	Field 10	Field 11	Field 12	Field 13	Field 14	Field 15	Field 16	Field 17	Field 18	Field 19	Field 20	Field 21	Field 22	Field 23	Field 24	Field 25	Field 26	Field 27	Field 28	Field 29	Field 30	Field 31	Field 32	Field 33	Field 34
1.1 Production methods
Notes: Enter "1" where applicable and "0" where not applicable
	1.1.1 Downhole pump			NA	0	0	0	0	0	0	0	0	0	0	0	0	0	0	0	0	0	0	0	0	0	0	0	0	0	0	0	0	0	0	0	0	0	0
	1.1.2 Water reinjection			NA	0	0	0	0	0	0	0	0	0	0	0	0	0	0	0	0	0	0	0	0	0	0	0	0	0	0	0	0	0	0	0	0	0	0
	1.1.3 Natural gas reinjection			NA	0	0	0	0	0	0	0	0	0	0	0	0	0	0	0	0	0	0	0	0	0	0	0	0	0	1	1	1	1	1	1	1	1	1
	1.1.4 Water flooding			NA	0	0	0	0	0	0	0	0	0	0	0	0	0	0	0	0	0	0	0	0	0	0	0	0	0	0	0	0	0	0	0	0	0	0
	1.1.5 Gas lifting			NA	0	0	0	0	0	0	0	0	0	0	0	0	0	0	0	0	0	0	0	0	0	0	0	0	0	0	0	0	0	0	0	0	0	0
	1.1.6 Gas flooding			NA	0	0	0	0	0	0	0	0	0	0	0	0	0	0	0	0	0	0	0	0	0	1	1	1	1	1	1	1	1	1	1	1	1	1
	1.1.7 Steam flooding			NA	0	0	0	0	0	0	0	0	0	0	0	0	0	0	0	0	0	0	0	0	0	0	0	0	0	0	0	0	0	0	0	0	0	0
	1.1.8 Oil sands mine (integrated with upgrader)			NA	0	0	0	0	0	0	0	0	0	0	0	0	0	0	0	0	0	0	0	0	0	0	0	0	0	0	0	0	0	0	0	0	0	0
	1.1.9 Oil sands mine (non-integrated with upgrader)			NA	0	0	0	0	0	0	0	0	0	0	0	0	0	0	0	0	0	0	0	0	0	0	0	0	0	0	0	0	0	0	0	0	0	0
1.2 Field properties
	1.2.1 Field location (Country)			NA	Mexico	Mexico	Mexico	Mexico	Mexico	Mexico	Mexico	Mexico	Mexico	Mexico	Mexico	Mexico	Mexico	Mexico	Mexico	Mexico	Mexico	Mexico	Mexico	Mexico	Mexico	Mexico	Mexico	Mexico	Mexico	Mexico	Mexico	Mexico	Mexico	Mexico	Mexico	Mexico	Mexico	Mexico
	1.2.2 Field name			NA	Cantarell 1979	Cantarell 1980	Cantarell 1981	Cantarell 1982	Cantarell 1983	Cantarell 1984	Cantarell 1985	Cantarell 1986	Cantarell 1987	Cantarell 1988	Cantarell 1989	Cantarell 1990	Cantarell 1991	Cantarell 1992	Cantarell 1993	Cantarell 1994	Cantarell 1995	Cantarell 1996	Cantarell 1997	Cantarell 1998	Cantarell 1999	Cantarell 2000	Cantarell 2001	Cantarell 2002	Cantarell 2003	Cantarell 2004	Cantarell 2005	Cantarell 2006	Cantarell 2007	Cantarell 2008	Cantarell 2009	Cantarell 2010	Cantarell 2011	Cantarell 2012
	1.2.3 Field age			yr.	1	2	3	4	5	6	7	8	9	10	11	12	13	14	15	16	17	18	19	20	21	22	23	24	25	26	27	28	29	30	31	32	33	34
	1.2.4 Field depth			ft	7544	7544	7544	7544	7544	7544	7544	7544	7544	7544	7544	7544	7544	7544	7544	7544	7544	7544	7544	7544	7544	7544	7544	7544	7544	7544	7544	7544	7544	7544	7544	7544	7544	7544
	1.2.5 Oil production volume			bbl/d	106743	592960	823656	844965	840365	895964	851518	737721	902575	865858	894906	941910	985433	954802	905219	894509	781428	966040	1.0862e+06	1.21792e+06	1.19434e+06	1.3827e+06	1.61879e+06	1.8289e+06	2.04363e+06	2.05087e+06	1.93381e+06	1.65428e+06	1.3843e+06	963018	544656	359592	306263	234864
	1.2.6 Number of producing wells			[-]	3.09812	20.5511	38.5234	43.8152	49.7156	54.0292	63.0803	68.904	79.6318	88.1703	101.761	116.481	125.031	131.321	135.401	138.676	137.592	140.303	152.837	167.291	147.381	165.234	177.152	191.617	207.184	209.831	199.736	194.377	181.31	171.267	160.171	153.286	164.677	164.221
	1.2.7 Number of water injecting wells			[-]
	1.2.8 Well diameter			in	7	7	7	7	7	7	7	7	7	7	7	7	7	7	7	7	7	7	7	7	7	7	7	7	7	7	7	7	7	7	7	7	7	7
	1.2.9 Productivity index			bbl/psi-d	150	150	150	150	150	150	150	150	150	150	150	150	150	150	150	150	150	150	150	150	150	150	150	150	150	150	150	150	150	150	150	150	150	150
	1.2.10 Reservoir pressure			psi	3815.05	3534.84	3185.99	2989.09	2814.57	2678.79	2580.91	2500.51	2408.83	2315.46	2242.4	2175.54	2092.04	1990.87	1926.93	1866.75	1802.34	1758.61	1703.13	1618.51	1547.04	1488.74	1492.51	1487.8	1445.49	1411.64	1374.03	1338.3	1315.73	1232.51	1084.42	1031.76	1022.36	1028
	1.2.11 Reservoir temperature			◦F	212	212	212	212	212	212	212	212	212	212	212	212	212	212	212	212	212	212	212	212	212	212	212	212	212	212	212	212	212	212	212	212	212	212
	1.2.12 Offshore?			[0-1]	1	1	1	1	1	1	1	1	1	1	1	1	1	1	1	1	1	1	1	1	1	1	1	1	1	1	1	1	1	1	1	1	1	1
	1.2.13 New Wells Drilled (Producers or Injectors)			wells	3.09812	17.453	17.9723	5.2918	5.90031	4.31367	9.05105	5.82369	10.7278	8.53849	13.5903	14.7205	8.55022	6.28989	4.07993	3.27528	0	2.71051	12.5344	14.4537	0	17.8529	11.9185	14.4649	15.5667	2.64755	0	0	0	0	0	0	11.3918	0
1.3 Fluid properties
	1.3.1 API gravity			deg. API	22	22	22	22	22	22	22	22	22	22	22	22	22	22	22	22	22	22	22	22	22	22	22	22	22	22	22	22	22	22	22	22	22	22
	1.3.2 Gas composition
		N2		mol%
		CO2		mol%
		C1		mol%
		C2		mol%
		C3		mol%
		C4+		mol%
		H2S		mol%
1.4 Production practices
Notes: Enter "NA" where not applicable
	1.4.1 Gas-to-oil ratio (GOR)			scf/bbl oil	343.068	415.655	430.974	475.678	418.219	411.318	413.587	406.089	452.344	437.046	440.241	390.186	362.694	394.127	394.519	392.015	410.127	383.107	376.72	354.107	346.149	356.923	346.347	343.405	344.594	339.913	331.914	379.003	766.308	1648.52	2399.2	3219.36	2992.32	3692.76
	1.4.2 Water-to-oil ratio (WOR)			bbl water/bbl oil	0	0	0	0	0	0	0	0	0	0	0	0	0	0	0	0	0	0	0	0	0	0	0	0	0	0	0	0	0.0369152	0.0851881	0.153592	0.26098	0.450775	0.692463
	1.4.3 Water injection ratio			bbl water/bbl oil
	1.4.4 Gas lifting injection ratio			scf/bbl liquid	0	0	0	0	0	0	0	0	247.037	285.124	318.391	346.261	355.263	385.105	418.819	434.086	493.018	406.658	393.984	384.602	345.519	334.603	306.418	293.362	283.865	286.478	289.201	328.998	353.678	458.873	713.784	946.546	1037.76	1156.78
	1.4.5 Gas flooding injection ratio			scf/bbl oil	0	0	0	0	0	0	0	0	0	0	0	0	0	0	0	0	0	0	0	0	0	406.097	625.157	449.185	485.229	544.456	549.65	689.378	923.017	1265.1	1537.46	2219.49	1634.09	3095.6
	1.4.6 Flood gas			NA	2	2	2	2	2	2	2	2	2	2	2	2	2	2	2	2	2	2	2	2	2	2	2	2	2	2	2	2	2	2	2	2	2	2
		1= Natural gas
		2= Nitrogen (N2)
		3= Carbon Dioxide (CO2)
		4= Air
		5= Oxygen (O2)
	1.4.7 Carbon dioxide flooding and sequestration parameters
		1.4.7.1 Percentage of newly acquired CO2 (total injected CO2 includes both new and recycled)		%
		1.4.7.2 Source of CO2		NA
			1= Natural subsurface reservoir
			2= Anthropogenic
		1.4.7.3 Percentage of sequestration credit assigned to the oilfield		%
	1.4.8 Steam-to-oil ratio (SOR)			bbl steam/bbl oil
	1.4.9 Fraction of required electricity generated onsite			[-]	1	1	1	1	1	1	1	1	1	1	1	1	1	1	1	1	1	1	1	1	1	1	1	1	1	1	1	1	1	1	1	1	1	1
	1.4.10 Fraction of remaining natural gas reinjected			[-]	0	0	0	0	0	0	0	0	0	0	0	0	0	0	0	0	0	0	0	0	0	0	0	0	0	0.22	0.23	0.34	0.25	0.21	0.43	-1	-1	-1
	1.4.11 Fraction of water produced that is reinjected			[-]
	1.4.12 Fraction of steam generation via cogeneration			[-]
1.5 Processing practices
	1.5.1 Heater/treater			NA	0	0	0	0	0	0	0	0	0	0	0	0	0	0	0	0	0	0	0	0	0	0	0	0	0	0	0	0	0	0	0	0	0	0
	1.5.2 Stabilizer column			NA	1	1	1	1	1	1	1	1	1	1	1	1	1	1	1	1	1	1	1	1	1	1	1	1	1	1	1	1	1	1	1	1	1	1
	1.5.3 Upgrader type				0	0	0	0	0	0	0	0	0	0	0	0	0	0	0	0	0	0	0	0	0	0	0	0	0	0	0	0	0	0	0	0	0	0
		0 = None
		1 = Delayed coking
		2 = Hydroconversion
		3 = Combined hydroconversion and fluid coking
	1.5.3 Associated Gas Processing Path			NA	5	5	5	5	5	5	5	5	5	5	5	5	5	5	5	5	5	5	5	5	5	5	5	5	5	5	5	5	5	5	5	5	5	5
		1= None
		2= Minimal: Dehydrator
		3= Acid Gas: Dehydrator + Amine Process
		4= Wet Gas: Dehydrator + Demethanizer
		5= Acid Wet Gas: Dehydrator + Amine Process + Demethanizer
		6= CO2-EOR Membrane: Dehydrator + Compressor + Membrane + Amine Process + Demethanizer
		7= CO2-EOR Ryan Holmes: Dehydrator + Ryan Holmes Process (Demethanizer Included)
		Notes: Choose paths 6 or 7 only if gas flooding is ON and CO2 is the flood gas
	1.5.4 Flaring-to-oil ratio			scf/bbl oil
	1.5.5 Venting-to-oil ratio			scf/bbl oil
	1.5.6 Volume fraction of diluent			[-]
1.6 Land use impacts
	1.6.1 Crude ecosystem carbon richness
		1.6.1.1 Low carbon richness (semi-arid grasslands)		NA	1	1	1	1	1	1	1	1	1	1	1	1	1	1	1	1	1	1	1	1	1	1	1	1	1	1	1	1	1	1	1	1	1	1
		1.6.1.2 Moderate carbon richness (mixed)		NA	0	0	0	0	0	0	0	0	0	0	0	0	0	0	0	0	0	0	0	0	0	0	0	0	0	0	0	0	0	0	0	0	0	0
		1.6.1.3 High carbon richness (forested)		NA	0	0	0	0	0	0	0	0	0	0	0	0	0	0	0	0	0	0	0	0	0	0	0	0	0	0	0	0	0	0	0	0	0	0
	1.6.2 Field development intensity
		1.6.2.1 Low intensity development and low oxidation		NA	1	1	1	1	1	1	1	1	1	1	1	1	1	1	1	1	1	1	1	1	1	1	1	1	1	1	1	1	1	1	1	1	1	1
		1.6.2.2 Moderate intensity development and moderate oxidation		NA	0	0	0	0	0	0	0	0	0	0	0	0	0	0	0	0	0	0	0	0	0	0	0	0	0	0	0	0	0	0	0	0	0	0
		1.6.2.3 High intensity development and high oxidation		NA	0	0	0	0	0	0	0	0	0	0	0	0	0	0	0	0	0	0	0	0	0	0	0	0	0	0	0	0	0	0	0	0	0	0
1.8 Crude oil transport
	1.8.1 Fraction of oil transported by each mode
		1.8.1.1 Ocean tanker		[-]	1	1	1	1	1	1	1	1	1	1	1	1	1	1	1	1	1	1	1	1	1	1	1	1	1	1	1	1	1	1	1	1	1	1
		1.8.1.2 Barge		[-]	0	0	0	0	0	0	0	0	0	0	0	0	0	0	0	0	0	0	0	0	0	0	0	0	0	0	0	0	0	0	0	0	0	0
		1.8.1.3 Pipeline		[-]	0	0	0	0	0	0	0	0	0	0	0	0	0	0	0	0	0	0	0	0	0	0	0	0	0	0	0	0	0	0	0	0	0	0
		1.8.1.4 Rail		[-]	0	0	0	0	0	0	0	0	0	0	0	0	0	0	0	0	0	0	0	0	0	0	0	0	0	0	0	0	0	0	0	0	0	0
		1.8.1.5 Truck			0	0	0	0	0	0	0	0	0	0	0	0	0	0	0	0	0	0	0	0	0	0	0	0	0	0	0	0	0	0	0	0	0	0
	1.8.2 Transport distance (one way)
		1.8.2.1 Ocean tanker		Mile	765	765	765	765	765	765	765	765	765	765	765	765	765	765	765	765	765	765	765	765	765	765	765	765	765	765	765	765	765	765	765	765	765	765
		1.8.2.2 Barge		Mile	0	0	0	0	0	0	0	0	0	0	0	0	0	0	0	0	0	0	0	0	0	0	0	0	0	0	0	0	0	0	0	0	0	0
		1.8.2.3 Pipeline		Mile	0	0	0	0	0	0	0	0	0	0	0	0	0	0	0	0	0	0	0	0	0	0	0	0	0	0	0	0	0	0	0	0	0	0
		1.8.2.4 Rail		Mile	0	0	0	0	0	0	0	0	0	0	0	0	0	0	0	0	0	0	0	0	0	0	0	0	0	0	0	0	0	0	0	0	0	0
		1.8.2.5 Truck			0	0	0	0	0	0	0	0	0	0	0	0	0	0	0	0	0	0	0	0	0	0	0	0	0	0	0	0	0	0	0	0	0	0
	1.8.3 Ocean tanker size, if applicable			Ton
1.9 Small sources emissions				gCO2eq/MJ
1.10 Run model

## Sheet: Cantarell - Gas lift
1 Inputs
Variables				Unit	Field 1	Field 2	Field 3	Field 4	Field 5	Field 6	Field 7	Field 8	Field 9	Field 10	Field 11	Field 12	Field 13	Field 14	Field 15	Field 16	Field 17	Field 18	Field 19	Field 20	Field 21	Field 22	Field 23	Field 24	Field 25	Field 26	Field 27	Field 28	Field 29	Field 30	Field 31	Field 32	Field 33	Field 34
1.1 Production methods
Notes: Enter "1" where applicable and "0" where not applicable
	1.1.1 Downhole pump			NA	0	0	0	0	0	0	0	0	0	0	0	0	0	0	0	0	0	0	0	0	0	0	0	0	0	0	0	0	0	0	0	0	0	0
	1.1.2 Water reinjection			NA	0	0	0	0	0	0	0	0	0	0	0	0	0	0	0	0	0	0	0	0	0	0	0	0	0	0	0	0	0	0	0	0	0	0
	1.1.3 Natural gas reinjection			NA	0	0	0	0	0	0	0	0	0	0	0	0	0	0	0	0	0	0	0	0	0	0	0	0	0	1	1	1	1	1	1	1	1	1
	1.1.4 Water flooding			NA	0	0	0	0	0	0	0	0	0	0	0	0	0	0	0	0	0	0	0	0	0	0	0	0	0	0	0	0	0	0	0	0	0	0
	1.1.5 Gas lifting			NA	0	0	0	0	0	0	0	0	1	1	1	1	1	1	1	1	1	1	1	1	1	1	1	1	1	1	1	1	1	1	1	1	1	1
	1.1.6 Gas flooding			NA	0	0	0	0	0	0	0	0	0	0	0	0	0	0	0	0	0	0	0	0	0	1	1	1	1	1	1	1	1	1	1	1	1	1
	1.1.7 Steam flooding			NA	0	0	0	0	0	0	0	0	0	0	0	0	0	0	0	0	0	0	0	0	0	0	0	0	0	0	0	0	0	0	0	0	0	0
	1.1.8 Oil sands mine (integrated with upgrader)			NA	0	0	0	0	0	0	0	0	0	0	0	0	0	0	0	0	0	0	0	0	0	0	0	0	0	0	0	0	0	0	0	0	0	0
	1.1.9 Oil sands mine (non-integrated with upgrader)			NA	0	0	0	0	0	0	0	0	0	0	0	0	0	0	0	0	0	0	0	0	0	0	0	0	0	0	0	0	0	0	0	0	0	0
1.2 Field properties
	1.2.1 Field location (Country)			NA	Mexico	Mexico	Mexico	Mexico	Mexico	Mexico	Mexico	Mexico	Mexico	Mexico	Mexico	Mexico	Mexico	Mexico	Mexico	Mexico	Mexico	Mexico	Mexico	Mexico	Mexico	Mexico	Mexico	Mexico	Mexico	Mexico	Mexico	Mexico	Mexico	Mexico	Mexico	Mexico	Mexico	Mexico
	1.2.2 Field name			NA	Cantarell 1979	Cantarell 1980	Cantarell 1981	Cantarell 1982	Cantarell 1983	Cantarell 1984	Cantarell 1985	Cantarell 1986	Cantarell 1987	Cantarell 1988	Cantarell 1989	Cantarell 1990	Cantarell 1991	Cantarell 1992	Cantarell 1993	Cantarell 1994	Cantarell 1995	Cantarell 1996	Cantarell 1997	Cantarell 1998	Cantarell 1999	Cantarell 2000	Cantarell 2001	Cantarell 2002	Cantarell 2003	Cantarell 2004	Cantarell 2005	Cantarell 2006	Cantarell 2007	Cantarell 2008	Cantarell 2009	Cantarell 2010	Cantarell 2011	Cantarell 2012
	1.2.3 Field age			yr.	1	2	3	4	5	6	7	8	9	10	11	12	13	14	15	16	17	18	19	20	21	22	23	24	25	26	27	28	29	30	31	32	33	34
	1.2.4 Field depth			ft	7544	7544	7544	7544	7544	7544	7544	7544	7544	7544	7544	7544	7544	7544	7544	7544	7544	7544	7544	7544	7544	7544	7544	7544	7544	7544	7544	7544	7544	7544	7544	7544	7544	7544
	1.2.5 Oil production volume			bbl/d	106743	592960	823656	844965	840365	895964	851518	737721	902575	865858	894906	941910	985433	954802	905219	894509	781428	966040	1.0862e+06	1.21792e+06	1.19434e+06	1.3827e+06	1.61879e+06	1.8289e+06	2.04363e+06	2.05087e+06	1.93381e+06	1.65428e+06	1.3843e+06	963018	544656	359592	306263	234864
	1.2.6 Number of producing wells			[-]	3.09812	20.5511	38.5234	43.8152	49.7156	54.0292	63.0803	68.904	79.6318	88.1703	101.761	116.481	125.031	131.321	135.401	138.676	137.592	140.303	152.837	167.291	147.381	165.234	177.152	191.617	207.184	209.831	199.736	194.377	181.31	171.267	160.171	153.286	164.677	164.221
	1.2.7 Number of water injecting wells			[-]
	1.2.8 Well diameter			in	7	7	7	7	7	7	7	7	7	7	7	7	7	7	7	7	7	7	7	7	7	7	7	7	7	7	7	7	7	7	7	7	7	7
	1.2.9 Productivity index			bbl/psi-d	150	150	150	150	150	150	150	150	150	150	150	150	150	150	150	150	150	150	150	150	150	150	150	150	150	150	150	150	150	150	150	150	150	150
	1.2.10 Reservoir pressure			psi	3815.05	3534.84	3185.99	2989.09	2814.57	2678.79	2580.91	2500.51	2408.83	2315.46	2242.4	2175.54	2092.04	1990.87	1926.93	1866.75	1802.34	1758.61	1703.13	1618.51	1547.04	1488.74	1492.51	1487.8	1445.49	1411.64	1374.03	1338.3	1315.73	1232.51	1084.42	1031.76	1022.36	1028
	1.2.11 Reservoir temperature			◦F	212	212	212	212	212	212	212	212	212	212	212	212	212	212	212	212	212	212	212	212	212	212	212	212	212	212	212	212	212	212	212	212	212	212
	1.2.12 Offshore?			[0-1]	1	1	1	1	1	1	1	1	1	1	1	1	1	1	1	1	1	1	1	1	1	1	1	1	1	1	1	1	1	1	1	1	1	1
	1.2.13 New Wells Drilled (Producers or Injectors)			wells	3.09812	17.453	17.9723	5.2918	5.90031	4.31367	9.05105	5.82369	10.7278	8.53849	13.5903	14.7205	8.55022	6.28989	4.07993	3.27528	0	2.71051	12.5344	14.4537	0	17.8529	11.9185	14.4649	15.5667	2.64755	0	0	0	0	0	0	11.3918	0
1.3 Fluid properties
	1.3.1 API gravity			deg. API	22	22	22	22	22	22	22	22	22	22	22	22	22	22	22	22	22	22	22	22	22	22	22	22	22	22	22	22	22	22	22	22	22	22
	1.3.2 Gas composition
		N2		mol%
		CO2		mol%
		C1		mol%
		C2		mol%
		C3		mol%
		C4+		mol%
		H2S		mol%
1.4 Production practices
Notes: Enter "NA" where not applicable
	1.4.1 Gas-to-oil ratio (GOR)			scf/bbl oil	343.068	415.655	430.974	475.678	418.219	411.318	413.587	406.089	452.344	437.046	440.241	390.186	362.694	394.127	394.519	392.015	410.127	383.107	376.72	354.107	346.149	356.923	346.347	343.405	344.594	339.913	331.914	379.003	766.308	1648.52	2399.2	3219.36	2992.32	3692.76
	1.4.2 Water-to-oil ratio (WOR)			bbl water/bbl oil	0	0	0	0	0	0	0	0	0	0	0	0	0	0	0	0	0	0	0	0	0	0	0	0	0	0	0	0	0.0369152	0.0851881	0.153592	0.26098	0.450775	0.692463
	1.4.3 Water injection ratio			bbl water/bbl oil
	1.4.4 Gas lifting injection ratio			scf/bbl liquid	0	0	0	0	0	0	0	0	247.037	285.124	318.391	346.261	355.263	385.105	418.819	434.086	493.018	406.658	393.984	384.602	345.519	334.603	306.418	293.362	283.865	286.478	289.201	328.998	353.678	458.873	713.784	946.546	1037.76	1156.78
	1.4.5 Gas flooding injection ratio			scf/bbl oil	0	0	0	0	0	0	0	0	0	0	0	0	0	0	0	0	0	0	0	0	0	406.097	625.157	449.185	485.229	544.456	549.65	689.378	923.017	1265.1	1537.46	2219.49	1634.09	3095.6
	1.4.6 Flood gas			NA	2	2	2	2	2	2	2	2	2	2	2	2	2	2	2	2	2	2	2	2	2	2	2	2	2	2	2	2	2	2	2	2	2	2
		1= Natural gas
		2= Nitrogen (N2)
		3= Carbon Dioxide (CO2)
		4= Air
		5= Oxygen (O2)
	1.4.7 Carbon dioxide flooding and sequestration parameters
		1.4.7.1 Percentage of newly acquired CO2 (total injected CO2 includes both new and recycled)		%
		1.4.7.2 Source of CO2		NA
			1= Natural subsurface reservoir
			2= Anthropogenic
		1.4.7.3 Percentage of sequestration credit assigned to the oilfield		%
	1.4.8 Steam-to-oil ratio (SOR)			bbl steam/bbl oil
	1.4.9 Fraction of required electricity generated onsite			[-]	1	1	1	1	1	1	1	1	1	1	1	1	1	1	1	1	1	1	1	1	1	1	1	1	1	1	1	1	1	1	1	1	1	1
	1.4.10 Fraction of remaining natural gas reinjected			[-]	0	0	0	0	0	0	0	0	0	0	0	0	0	0	0	0	0	0	0	0	0	0	0	0	0	0.22	0.23	0.32	0.25	0.21	0.43	-1	-1	-1
	1.4.11 Fraction of water produced that is reinjected			[-]
	1.4.12 Fraction of steam generation via cogeneration			[-]
1.5 Processing practices
	1.5.1 Heater/treater			NA	0	0	0	0	0	0	0	0	0	0	0	0	0	0	0	0	0	0	0	0	0	0	0	0	0	0	0	0	0	0	0	0	0	0
	1.5.2 Stabilizer column			NA	1	1	1	1	1	1	1	1	1	1	1	1	1	1	1	1	1	1	1	1	1	1	1	1	1	1	1	1	1	1	1	1	1	1
	1.5.3 Upgrader type				0	0	0	0	0	0	0	0	0	0	0	0	0	0	0	0	0	0	0	0	0	0	0	0	0	0	0	0	0	0	0	0	0	0
		0 = None
		1 = Delayed coking
		2 = Hydroconversion
		3 = Combined hydroconversion and fluid coking
	1.5.3 Associated Gas Processing Path			NA	5	5	5	5	5	5	5	5	5	5	5	5	5	5	5	5	5	5	5	5	5	5	5	5	5	5	5	5	5	5	5	5	5	5
		1= None
		2= Minimal: Dehydrator
		3= Acid Gas: Dehydrator + Amine Process
		4= Wet Gas: Dehydrator + Demethanizer
		5= Acid Wet Gas: Dehydrator + Amine Process + Demethanizer
		6= CO2-EOR Membrane: Dehydrator + Compressor + Membrane + Amine Process + Demethanizer
		7= CO2-EOR Ryan Holmes: Dehydrator + Ryan Holmes Process (Demethanizer Included)
		Notes: Choose paths 6 or 7 only if gas flooding is ON and CO2 is the flood gas
	1.5.4 Flaring-to-oil ratio			scf/bbl oil
	1.5.5 Venting-to-oil ratio			scf/bbl oil
	1.5.6 Volume fraction of diluent			[-]
1.6 Land use impacts
	1.6.1 Crude ecosystem carbon richness
		1.6.1.1 Low carbon richness (semi-arid grasslands)		NA	1	1	1	1	1	1	1	1	1	1	1	1	1	1	1	1	1	1	1	1	1	1	1	1	1	1	1	1	1	1	1	1	1	1
		1.6.1.2 Moderate carbon richness (mixed)		NA	0	0	0	0	0	0	0	0	0	0	0	0	0	0	0	0	0	0	0	0	0	0	0	0	0	0	0	0	0	0	0	0	0	0
		1.6.1.3 High carbon richness (forested)		NA	0	0	0	0	0	0	0	0	0	0	0	0	0	0	0	0	0	0	0	0	0	0	0	0	0	0	0	0	0	0	0	0	0	0
	1.6.2 Field development intensity
		1.6.2.1 Low intensity development and low oxidation		NA	1	1	1	1	1	1	1	1	1	1	1	1	1	1	1	1	1	1	1	1	1	1	1	1	1	1	1	1	1	1	1	1	1	1
		1.6.2.2 Moderate intensity development and moderate oxidation		NA	0	0	0	0	0	0	0	0	0	0	0	0	0	0	0	0	0	0	0	0	0	0	0	0	0	0	0	0	0	0	0	0	0	0
		1.6.2.3 High intensity development and high oxidation		NA	0	0	0	0	0	0	0	0	0	0	0	0	0	0	0	0	0	0	0	0	0	0	0	0	0	0	0	0	0	0	0	0	0	0
1.8 Crude oil transport
	1.8.1 Fraction of oil transported by each mode
		1.8.1.1 Ocean tanker		[-]	1	1	1	1	1	1	1	1	1	1	1	1	1	1	1	1	1	1	1	1	1	1	1	1	1	1	1	1	1	1	1	1	1	1
		1.8.1.2 Barge		[-]	0	0	0	0	0	0	0	0	0	0	0	0	0	0	0	0	0	0	0	0	0	0	0	0	0	0	0	0	0	0	0	0	0	0
		1.8.1.3 Pipeline		[-]	0	0	0	0	0	0	0	0	0	0	0	0	0	0	0	0	0	0	0	0	0	0	0	0	0	0	0	0	0	0	0	0	0	0
		1.8.1.4 Rail		[-]	0	0	0	0	0	0	0	0	0	0	0	0	0	0	0	0	0	0	0	0	0	0	0	0	0	0	0	0	0	0	0	0	0	0
		1.8.1.5 Truck			0	0	0	0	0	0	0	0	0	0	0	0	0	0	0	0	0	0	0	0	0	0	0	0	0	0	0	0	0	0	0	0	0	0
	1.8.2 Transport distance (one way)
		1.8.2.1 Ocean tanker		Mile	765	765	765	765	765	765	765	765	765	765	765	765	765	765	765	765	765	765	765	765	765	765	765	765	765	765	765	765	765	765	765	765	765	765
		1.8.2.2 Barge		Mile	0	0	0	0	0	0	0	0	0	0	0	0	0	0	0	0	0	0	0	0	0	0	0	0	0	0	0	0	0	0	0	0	0	0
		1.8.2.3 Pipeline		Mile	0	0	0	0	0	0	0	0	0	0	0	0	0	0	0	0	0	0	0	0	0	0	0	0	0	0	0	0	0	0	0	0	0	0
		1.8.2.4 Rail		Mile	0	0	0	0	0	0	0	0	0	0	0	0	0	0	0	0	0	0	0	0	0	0	0	0	0	0	0	0	0	0	0	0	0	0
		1.8.2.5 Truck			0	0	0	0	0	0	0	0	0	0	0	0	0	0	0	0	0	0	0	0	0	0	0	0	0	0	0	0	0	0	0	0	0	0
	1.8.3 Ocean tanker size, if applicable			Ton
1.9 Small sources emissions				gCO2eq/MJ

## Sheet: Cantarell - Weights  
Year	Free Flowing	Gas Lift	Free Flow Share	Gas Lift Share
1979	3.09812	0	1	0
1980	20.5511	0	1	0
1981	38.5234	0	1	0
1982	43.8152	0	1	0
1983	49.7156	0	1	0
1984	54.0292	0	1	0
1985	63.0803	0	1	0
1986	68.904	0	1	0
1987	74.3433	5.28846	0.933589	0.0664114
1988	68.4588	19.7115	0.776438	0.223562
1989	39.7414	62.0192	0.390538	0.609462
1990	29.9426	86.5385	0.25706	0.74294
1991	16.8582	108.173	0.134832	0.865168
1992	5.84044	125.481	0.0444744	0.955526
1993	6.55498	128.846	0.0484116	0.951588
1994	3.58026	135.096	0.0258173	0.974183
1995	0	139.423	0	1
1996	0	134.135	0	1
1997	0	152.837	0	1
1998	0	167.291	0	1
1999	0	147.381	0	1
2000	0	165.234	0	1
2001	0	177.152	0	1
2002	0	191.617	0	1
2003	0	207.184	0	1
2004	0	209.831	0	1
2005	0	199.736	0	1
2006	0	194.377	0	1
2007	0	181.31	0	1
2008	0	171.267	0	1
2009	0	160.171	0	1
2010	0	153.286	0	1
2011	0	164.677	0	1
2012	0	164.221	0	1

## Sheet: Coalinga
1 Inputs
Variables				Unit	Field 1	Field 2	Field 3	Field 4	Field 5	Field 6	Field 7	Field 8	Field 9	Field 10	Field 11	Field 12	Field 13	Field 14	Field 15	Field 16	Field 17	Field 18	Field 19	Field 20	Field 21	Field 22	Field 23	Field 24	Field 25	Field 26	Field 27	Field 28	Field 29	Field 30	Field 31	Field 32	Field 33	Field 34	Field 35	Field 36	Field 37	Field 38	Field 39
1.1 Production methods
Notes: Enter "1" where applicable and "0" where not applicable
	1.1.1 Downhole pump			NA	0	0	0	0	0	0	0	0	0	0	0	0	0	0	0	0	0	0	0	0	0	0	0	0	0	0	0	0	0	0	0	0	0	0	0	0	0	0	0
	1.1.2 Water reinjection			NA	1	1	1	1	1	1	1	1	1	1	1	1	1	1	1	1	1	1	1	1	1	1	1	1	1	1	1	1	1	1	1	1	1	1	1	1	1	1	1
	1.1.3 Natural gas reinjection			NA	0	0	0	0	0	0	0	0	0	0	0	0	0	0	0	0	0	0	0	0	0	0	0	0	0	0	0	0	0	0	0	0	0	0	0	0	0	0	0
	1.1.4 Water flooding			NA	0	0	0	0	0	0	0	0	0	0	0	0	0	0	0	0	0	0	0	0	0	0	0	0	0	0	0	0	0	0	0	0	0	0	0	0	0	0	0
	1.1.5 Gas lifting			NA	0	0	0	0	0	0	0	0	0	0	0	0	0	0	0	0	0	0	0	0	0	0	0	0	0	0	0	0	0	0	0	0	0	0	0	0	0	0	0
	1.1.6 Gas flooding			NA	0	0	0	0	0	0	0	0	0	0	0	0	0	0	0	0	0	0	0	0	0	0	0	0	0	0	0	0	0	0	0	0	0	0	0	0	0	0	0
	1.1.7 Steam flooding			NA	1	1	1	1	1	1	1	1	1	1	1	1	1	1	1	1	1	1	1	1	1	1	1	1	1	1	1	1	1	1	1	1	1	1	1	1	1	1	1
	1.1.8 Oil sands mine (integrated with upgrader)			NA	0	0	0	0	0	0	0	0	0	0	0	0	0	0	0	0	0	0	0	0	0	0	0	0	0	0	0	0	0	0	0	0	0	0	0	0	0	0	0
	1.1.9 Oil sands mine (non-integrated with upgrader)			NA	0	0	0	0	0	0	0	0	0	0	0	0	0	0	0	0	0	0	0	0	0	0	0	0	0	0	0	0	0	0	0	0	0	0	0	0	0	0	0
1.2 Field properties
	1.2.1 Field location (Country)			NA	USA	USA	USA	USA	USA	USA	USA	USA	USA	USA	USA	USA	USA	USA	USA	USA	USA	USA	USA	USA	USA	USA	USA	USA	USA	USA	USA	USA	USA	USA	USA	USA	USA	USA	USA	USA	USA	USA	USA
	1.2.2 Field name			NA	Coalinga 1977	Coalinga 1978	Coalinga 1979	Coalinga 1980	Coalinga 1981	Coalinga 1982	Coalinga 1983	Coalinga 1984	Coalinga 1985	Coalinga 1986	Coalinga 1987	Coalinga 1988	Coalinga 1989	Coalinga 1990	Coalinga 1991	Coalinga 1992	Coalinga 1993	Coalinga 1994	Coalinga 1995	Coalinga 1996	Coalinga 1997	Coalinga 1998	Coalinga 1999	Coalinga 2000	Coalinga 2001	Coalinga 2002	Coalinga 2003	Coalinga 2004	Coalinga 2005	Coalinga 2006	Coalinga 2007	Coalinga 2008	Coalinga 2009	Coalinga 2010	Coalinga 2011	Coalinga 2012	Coalinga 2013	Coalinga 2014	Coalinga 2015
	1.2.3 Field age			yr.	1	2	3	4	5	6	7	8	9	10	11	12	13	14	15	16	17	18	19	20	21	22	23	24	25	26	27	28	29	30	31	32	33	34	35	36	37	38	39
	1.2.4 Field depth			ft	2325	2325	2325	2325	2325	2325	2325	2325	2325	2325	2325	2325	2325	2325	2325	2325	2325	2325	2325	2325	2325	2325	2325	2325	2325	2325	2325	2325	2325	2325	2325	2325	2325	2325	2325	2325	2325	2325	2325
	1.2.5 Oil production volume			bbl/d	14259.8	16158.4	16581	20747.9	23083.4	24174.5	26256.4	27599	31197.8	31350.2	28442.8	27430.1	29179.1	31650.6	33965.9	31552.7	28305	26713.8	26525	26542.9	26362.6	24267.4	22499.7	21539.8	19614.2	18835.8	17533.7	16430.4	16131.9	15738.3	15400.3	15755.1	16107.8	15446	15249	15189.9	15133.7	16727	18574.6
	1.2.6 Number of producing wells			[-]	1887	2043	2018	2003	2052	2055	2032	2148	2207	2197	2136	2132	2065	2016	2048	1922	1767	1739	1763	1830	1842	1798	1749	1696	1613	1563	1516	1446	1405	1434	1426	1480	1459	1410	1437	1498	1530	1631	1632
	1.2.7 Number of water injecting wells			[-]	83	105	129	184	236	258	321	306	372	388	353	367	494	538	466	436	432	387	432	440	389	441	396	388	309	349	375	350	373	377	358	367	346	316	299	278	270	270	286
	1.2.8 Well diameter			in
	1.2.9 Productivity index			bbl/psi-d
	1.2.10 Reservoir pressure			psi	1603	1603	1603	1603	1603	1603	1603	1603	1603	1603	1603	1603	1603	1603	1603	1603	1603	1603	1603	1603	1603	1603	1603	1603	1603	1603	1603	1603	1603	1603	1603	1603	1603	1603	1603	1603	1603	1603	1603
	1.2.11 Reservoir temperature			◦F	107.5	107.5	107.5	107.5	107.5	107.5	107.5	107.5	107.5	107.5	107.5	107.5	107.5	107.5	107.5	107.5	107.5	107.5	107.5	107.5	107.5	107.5	107.5	107.5	107.5	107.5	107.5	107.5	107.5	107.5	107.5	107.5	107.5	107.5	107.5	107.5	107.5	107.5	107.5
	1.2.12 Offshore?			[0-1]	0	0	0	0	0	0	0	0	0	0	0	0	0	0	0	0	0	0	0	0	0	0	0	0	0	0	0	0	0	0	0	0	0	0	0	0	0	0	0
	1.2.13 New Wells Drilled (Producers or Injectors)			wells
1.3 Fluid properties
	1.3.1 API gravity			deg. API	17.75	17.75	17.75	17.75	17.75	17.75	17.75	17.75	17.75	17.75	17.75	17.75	17.75	17.75	17.75	17.75	17.75	17.75	17.75	17.75	17.75	17.75	17.75	17.75	17.75	17.75	17.75	17.75	17.75	17.75	17.75	17.75	17.75	17.75	17.75	17.75	17.75	17.75	17.75
	1.3.2 Gas composition
		N2		mol%
		CO2		mol%
		C1		mol%
		C2		mol%
		C3		mol%
		C4+		mol%
		H2S		mol%
1.4 Production practices
Notes: Enter "NA" where not applicable
	1.4.1 Gas-to-oil ratio (GOR)			scf/bbl oil	0	0.040693	0.0446129	0.0343325	0.0379802	0.0226662	0	0	0	0.0131087	0	0	0	0	0	0	0	0	0.936722	0.588553	0.280909	0.000338692	0.00669719	0	0	0.137599	0	0	0	0	0	0	12.7613	34.4851	37.8636	40.335	40.4857	41.3439	36.313
	1.4.2 Water-to-oil ratio (WOR)			bbl water/bbl oil	6.7851	6.65131	6.4963	6.31098	6.45035	6.54703	6.49127	6.86272	7.17195	7.11196	8.0963	8.02171	8.0235	8.28031	7.64788	7.63946	8.20378	8.32986	8.61423	9.33539	9.65601	9.66704	10.9716	11.2485	11.3603	11.0427	11.4544	12.569	13.3238	13.4075	13.3565	13.4491	12.1506	12.0971	11.9725	10.4215	9.6634	11.4219	10.8315
	1.4.3 Water injection ratio			bbl water/bbl oil	1.70295	1.32275	1.17808	1.05448	0.0645981	0.485337	0.470909	0.547075	0.369137	0.631507	1.43999	1.50348	1.77997	1.43057	0.427548	1.19789	1.48562	2.70221	3.2617	3.20023	3.99235	4.1182	3.92018	3.63214	3.61841	3.49316	3.78149	4.20914	4.52871	4.74832	4.65253	3.93534	3.05659	2.3874	2.24159	2.43587	2.49811	1.96947	1.64947
	1.4.4 Gas lifting injection ratio			scf/bbl liquid
	1.4.5 Gas flooding injection ratio			scf/bbl oil
	1.4.6 Flood gas			NA
		1= Natural gas
		2= Nitrogen (N2)
		3= Carbon Dioxide (CO2)
		4= Air
		5= Oxygen (O2)
	1.4.7 Carbon dioxide flooding and sequestration parameters
		1.4.7.1 Percentage of newly acquired CO2 (total injected CO2 includes both new and recycled)		%
		1.4.7.2 Source of CO2		NA
			1= Natural subsurface reservoir
			2= Anthropogenic
		1.4.7.3 Percentage of sequestration credit assigned to the oilfield		%
	1.4.8 Steam-to-oil ratio (SOR)			bbl steam/bbl oil	1.44282	1.1207	1.65529	3.05283	3.38028	3.50621	3.73952	4.13633	4.33102	4.77713	4.44861	4.36369	4.91111	4.88752	5.10005	4.39859	4.15501	3.04163	3.28222	3.27498	2.92247	3.35403	3.21686	3.83877	3.23277	4.11587	4.8299	4.54483	4.89121	4.98487	5.18404	5.95049	5.65983	5.5706	5.23037	5.68371	5.82892	6.17043	5.58539
	1.4.9 Fraction of required electricity generated onsite			[-]	1	1	1	1	1	1	1	1	1	1	1	1	1	1	1	1	1	1	1	1	1	1	1	1	1	1	1	1	1	1	1	1	1	1	1	1	1	1	1
	1.4.10 Fraction of remaining natural gas reinjected			[-]	0	0	0	0	0	0	0	0	0	0	0	0	0	0	0	0	0	0	0	0	0	0	0	0	0	0	0	0	0	0	0	0	0	0	0	0	0	0	0
	1.4.11 Fraction of water produced that is reinjected			[-]	0.250984	0.198871	0.181346	0.167086	0.0100147	0.0741308	0.072545	0.0797168	0.0514695	0.0887951	0.177857	0.187426	0.221844	0.172767	0.0559041	0.156803	0.18109	0.3244	0.37864	0.342806	0.413458	0.426004	0.357301	0.322901	0.318515	0.316333	0.330135	0.334882	0.339895	0.354154	0.348334	0.29261	0.25156	0.197354	0.187228	0.233735	0.258512	0.17243	0.152285
	1.4.12 Fraction of steam generation via cogeneration			[-]
1.5 Processing practices
	1.5.1 Heater/treater			NA	0	0	0	0	0	0	0	0	0	0	0	0	0	0	0	0	0	0	0	0	0	0	0	0	0	0	0	0	0	0	0	0	0	0	0	0	0	0	0
	1.5.2 Stabilizer column			NA	1	1	1	1	1	1	1	1	1	1	1	1	1	1	1	1	1	1	1	1	1	1	1	1	1	1	1	1	1	1	1	1	1	1	1	1	1	1	1
	1.5.3 Upgrader type				0	0	0	0	0	0	0	0	0	0	0	0	0	0	0	0	0	0	0	0	0	0	0	0	0	0	0	0	0	0	0	0	0	0	0	0	0	0	0
		0 = None
		1 = Delayed coking
		2 = Hydroconversion
		3 = Combined hydroconversion and fluid coking
	1.5.3 Associated Gas Processing Path			NA
		1= None
		2= Minimal: Dehydrator
		3= Acid Gas: Dehydrator + Amine Process
		4= Wet Gas: Dehydrator + Demethanizer
		5= Acid Wet Gas: Dehydrator + Amine Process + Demethanizer
		6= CO2-EOR Membrane: Dehydrator + Compressor + Membrane + Amine Process + Demethanizer
		7= CO2-EOR Ryan Holmes: Dehydrator + Ryan Holmes Process (Demethanizer Included)
		Notes: Choose paths 6 or 7 only if gas flooding is ON and CO2 is the flood gas
	1.5.4 Flaring-to-oil ratio			scf/bbl oil
	1.5.5 Venting-to-oil ratio			scf/bbl oil
	1.5.6 Volume fraction of diluent			[-]
1.6 Land use impacts
	1.6.1 Crude ecosystem carbon richness
		1.6.1.1 Low carbon richness (semi-arid grasslands)		NA
		1.6.1.2 Moderate carbon richness (mixed)		NA
		1.6.1.3 High carbon richness (forested)		NA
	1.6.2 Field development intensity
		1.6.2.1 Low intensity development and low oxidation		NA
		1.6.2.2 Moderate intensity development and moderate oxidation		NA
		1.6.2.3 High intensity development and high oxidation		NA
1.8 Crude oil transport
	1.8.1 Fraction of oil transported by each mode
		1.8.1.1 Ocean tanker		[-]	0	0	0	0	0	0	0	0	0	0	0	0	0	0	0	0	0	0	0	0	0	0	0	0	0	0	0	0	0	0	0	0	0	0	0	0	0	0	0
		1.8.1.2 Barge		[-]	0	0	0	0	0	0	0	0	0	0	0	0	0	0	0	0	0	0	0	0	0	0	0	0	0	0	0	0	0	0	0	0	0	0	0	0	0	0	0
		1.8.1.3 Pipeline		[-]	1	1	1	1	1	1	1	1	1	1	1	1	1	1	1	1	1	1	1	1	1	1	1	1	1	1	1	1	1	1	1	1	1	1	1	1	1	1	1
		1.8.1.4 Rail		[-]	0	0	0	0	0	0	0	0	0	0	0	0	0	0	0	0	0	0	0	0	0	0	0	0	0	0	0	0	0	0	0	0	0	0	0	0	0	0	0
		1.8.1.5 Truck			0	0	0	0	0	0	0	0	0	0	0	0	0	0	0	0	0	0	0	0	0	0	0	0	0	0	0	0	0	0	0	0	0	0	0	0	0	0	0
	1.8.2 Transport distance (one way)
		1.8.2.1 Ocean tanker		Mile	0	0	0	0	0	0	0	0	0	0	0	0	0	0	0	0	0	0	0	0	0	0	0	0	0	0	0	0	0	0	0	0	0	0	0	0	0	0	0
		1.8.2.2 Barge		Mile	0	0	0	0	0	0	0	0	0	0	0	0	0	0	0	0	0	0	0	0	0	0	0	0	0	0	0	0	0	0	0	0	0	0	0	0	0	0	0
		1.8.2.3 Pipeline		Mile	1800	1800	1800	1800	1800	1800	1800	1800	1800	1800	1800	1800	1800	1800	1800	1800	1800	1800	1800	1800	1800	1800	1800	1800	1800	1800	1800	1800	1800	1800	1800	1800	1800	1800	1800	1800	1800	1800	1800
		1.8.2.4 Rail		Mile	0	0	0	0	0	0	0	0	0	0	0	0	0	0	0	0	0	0	0	0	0	0	0	0	0	0	0	0	0	0	0	0	0	0	0	0	0	0	0
		1.8.2.5 Truck			0	0	0	0	0	0	0	0	0	0	0	0	0	0	0	0	0	0	0	0	0	0	0	0	0	0	0	0	0	0	0	0	0	0	0	0	0	0	0
	1.8.3 Ocean tanker size, if applicable			Ton
1.9 Small sources emissions				gCO2eq/MJ

## Sheet: Elk Hills
1 Inputs
Variables				Unit	Field 1	Field 2	Field 3	Field 4	Field 5	Field 6	Field 7	Field 8	Field 9	Field 10	Field 11	Field 12	Field 13	Field 14	Field 15	Field 16	Field 17	Field 18	Field 19	Field 20	Field 21	Field 22	Field 23	Field 24	Field 25	Field 26	Field 27	Field 28	Field 29	Field 30	Field 31	Field 32	Field 33	Field 34	Field 35	Field 36	Field 37	Field 38	Field 39
1.1 Production methods
Notes: Enter "1" where applicable and "0" where not applicable
	1.1.1 Downhole pump			NA	0	0	0	0	0	0	0	0	0	0	0	0	0	0	0	0	0	0	0	0	0	0	0	0	0	0	0	0	0	0	0	0	0	0	0	0	0	0	0
	1.1.2 Water reinjection			NA	0	1	1	1	1	1	1	0	1	0	0	0	0	1	1	0	1	1	1	1	1	1	1	1	1	1	1	1	1	1	1	1	1	1	1	1	1	1	1
	1.1.3 Natural gas reinjection			NA	0	1	1	1	1	1	1	1	1	1	1	1	1	1	1	1	1	1	1	1	1	1	1	1	1	1	1	1	1	1	1	1	1	1	1	1	1	1	1
	1.1.4 Water flooding			NA	0	0	0	0	0	0	0	1	0	1	1	1	1	0	0	1	0	0	0	0	0	0	0	0	0	0	0	0	0	0	0	0	0	0	0	0	0	0	0
	1.1.5 Gas lifting			NA	0	0	0	0	0	0	0	0	0	0	0	0	0	0	0	0	0	0	0	0	0	0	0	0	0	0	0	0	0	0	0	0	0	0	0	0	0	0	0
	1.1.6 Gas flooding			NA	0	0	0	0	0	0	0	0	0	0	0	0	0	0	0	0	0	0	0	0	0	0	0	0	0	0	0	0	0	0	0	0	0	0	0	0	0	0	0
	1.1.7 Steam flooding			NA	0	0	0	0	0	0	0	0	0	1	1	1	1	1	1	1	1	0	0	0	0	0	1	0	0	1	1	1	0	0	0	0	0	0	0	0	0	0	0
	1.1.8 Oil sands mine (integrated with upgrader)			NA	0	0	0	0	0	0	0	0	0	0	0	0	0	0	0	0	0	0	0	0	0	0	0	0	0	0	0	0	0	0	0	0	0	0	0	0	0	0	0
	1.1.9 Oil sands mine (non-integrated with upgrader)			NA	0	0	0	0	0	0	0	0	0	0	0	0	0	0	0	0	0	0	0	0	0	0	0	0	0	0	0	0	0	0	0	0	0	0	0	0	0	0	0
1.2 Field properties
	1.2.1 Field location (Country)			NA	USA	USA	USA	USA	USA	USA	USA	USA	USA	USA	USA	USA	USA	USA	USA	USA	USA	USA	USA	USA	USA	USA	USA	USA	USA	USA	USA	USA	USA	USA	USA	USA	USA	USA	USA	USA	USA	USA	USA
	1.2.2 Field name			NA	Elk Hills 1977	Elk Hills 1978	Elk Hills 1979	Elk Hills 1980	Elk Hills 1981	Elk Hills 1982	Elk Hills 1983	Elk Hills 1984	Elk Hills 1985	Elk Hills 1986	Elk Hills 1987	Elk Hills 1988	Elk Hills 1989	Elk Hills 1990	Elk Hills 1991	Elk Hills 1992	Elk Hills 1993	Elk Hills 1994	Elk Hills 1995	Elk Hills 1996	Elk Hills 1997	Elk Hills 1998	Elk Hills 1999	Elk Hills 2000	Elk Hills 2001	Elk Hills 2002	Elk Hills 2003	Elk Hills 2004	Elk Hills 2005	Elk Hills 2006	Elk Hills 2007	Elk Hills 2008	Elk Hills 2009	Elk Hills 2010	Elk Hills 2011	Elk Hills 2012	Elk Hills 2013	Elk Hills 2014	Elk Hills 2015
	1.2.3 Field age			yr.	1	2	3	4	5	6	7	8	9	10	11	12	13	14	15	16	17	18	19	20	21	22	23	24	25	26	27	28	29	30	31	32	33	34	35	36	37	38	39
	1.2.4 Field depth			ft	8360	8360	8360	8360	8360	8360	8360	8360	8360	8360	8360	8360	8360	8360	8360	8360	8360	8360	8360	8360	8360	8360	8360	8360	8360	8360	8360	8360	8360	8360	8360	8360	8360	8360	8360	8360	8360	8360	8360
	1.2.5 Oil production volume			bbl/d	570977	683881	824843	795940	961153	914754	854026	762249	719787	615559	622703	587655	524036	442302	406720	382241	363802	368806	346677	332073	315977	295748	284541	269085	285785	302468	286647	285580	277363	264555	251778	229345	211149	214480	220495	211988	194574	182363	172797
	1.2.6 Number of producing wells			[-]	477	819	921	892	1109	1163	1184	1211	1208	1089	1080	1075	1072	1042	1014	959	942	917	914	913	911	972	1012	1105	1299	1463	1638	1810	1998	2170	2264	2394	2400	2429	2587	2779	2814	3002	3122
	1.2.7 Number of water injecting wells			[-]	0	0	0	0	1	2	2	5	7	7	8	10	12	12	11	13	13	13	13	14	14	14	13	12	11	12	16	17	18	21	22	23	24	25	325	349	318	307	397
	1.2.8 Well diameter			in
	1.2.9 Productivity index			bbl/psi-d
	1.2.10 Reservoir pressure			psi	3178.94	3127.96	3048.11	2989.9	2967.74	2945.55	2865.72	2778.66	2698.86	2611.81	2560.83	2480.97	2458.81	2429.42	2428.84	2428.27	2427.66	2448.73	2440.92	2404.32	2346.11	2287.9	2229.69	2171.48	2113.26	2055.05	1996.84	1938.63	1880.41	1822.2	1763.99	1705.78	1647.57	1589.35	1531.14	1472.93	1414.72	1356.5	1298.29
	1.2.11 Reservoir temperature			◦F	150	150	150	150	150	150	150	150	150	150	150	150	150	150	150	150	150	150	150	150	150	150	150	150	150	150	150	150	150	150	150	150	150	150	150	150	150	150	150
	1.2.12 Offshore?			[0-1]	0	0	0	0	0	0	0	0	0	0	0	0	0	0	0	0	0	0	0	0	0	0	0	0	0	0	0	0	0	0	0	0	0	0	0	0	0	0	0
	1.2.13 New Wells Drilled (Producers or Injectors)			wells
1.3 Fluid properties
	1.3.1 API gravity			deg. API	34.6	34.6	34.6	34.6	34.6	34.6	34.6	34.6	34.6	34.6	34.6	34.6	34.6	34.6	34.6	34.6	34.6	34.6	34.6	34.6	34.6	34.6	34.6	34.6	34.6	34.6	34.6	34.6	34.6	34.6	34.6	34.6	34.6	34.6	34.6	34.6	34.6	34.6	34.6
	1.3.2 Gas composition
		N2		mol%
		CO2		mol%
		C1		mol%
		C2		mol%
		C3		mol%
		C4+		mol%
		H2S		mol%
1.4 Production practices
Notes: Enter "NA" where not applicable
	1.4.1 Gas-to-oil ratio (GOR)			scf/bbl oil	125.985	143.723	189.862	246.182	299.51	358.642	393.056	460.996	519.375	531.931	573.802	614.155	693.678	750.537	782.513	811.073	903.83	888.097	961.817	1086.61	1142.99	1315.91	1589.3	1662.54	1541.6	1400.65	1347.2	1288.34	1343.42	1488.24	1424.12	1425.47	1389.95	1591.49	1449.93	1428.95	1557.36	1631.26	1723.9
	1.4.2 Water-to-oil ratio (WOR)			bbl water/bbl oil	0.0385406	0.0349425	0.0362425	0.0410206	0.0530086	0.0681041	0.0799872	0.099275	0.11525	0.124835	0.134045	0.249485	0.306694	0.359536	0.350849	0.358004	0.49017	0.481498	0.448633	0.530852	0.496401	0.558647	0.412071	0.550318	0.580171	0.586226	0.710632	0.801121	0.967047	1.07084	1.15296	1.35729	1.5219	1.68355	1.95505	2.14755	2.2074	2.45782	2.67464
	1.4.3 Water injection ratio			bbl water/bbl oil	0	0.0120745	0.00730922	0.0141489	0.0111374	0.0159322	0.0430313	0.102264	0.106505	0.143527	0.198153	0.269544	0.314883	0.267893	0.330692	0.381742	0.374481	0.343369	0.345615	0.363709	0.362839	0.380303	0.319574	0.360592	0.372527	0.400707	0.440184	0.502112	0.559806	0.600402	0.577428	0.726467	0.909501	0.93593	0.949845	1.02899	1.16578	1.29154	1.56574
	1.4.4 Gas lifting injection ratio			scf/bbl liquid
	1.4.5 Gas flooding injection ratio			scf/bbl oil
	1.4.6 Flood gas			NA
		1= Natural gas
		2= Nitrogen (N2)
		3= Carbon Dioxide (CO2)
		4= Air
		5= Oxygen (O2)
	1.4.7 Carbon dioxide flooding and sequestration parameters
		1.4.7.1 Percentage of newly acquired CO2 (total injected CO2 includes both new and recycled)		%
		1.4.7.2 Source of CO2		NA
			1= Natural subsurface reservoir
			2= Anthropogenic
		1.4.7.3 Percentage of sequestration credit assigned to the oilfield		%
	1.4.8 Steam-to-oil ratio (SOR)			bbl steam/bbl oil	0	0	0	0	0	0	0	0	0	0.000254465	0.000226304	0.00233047	0.00465867	0.00520635	0.00381066	0.00138015	0.000100649	0	0	0	0	0	1.60701e-05	0	0	0.00440464	0.00306194	0.00110195	0	0	0	0	0	0	0	0	0	0	0
	1.4.9 Fraction of required electricity generated onsite			[-]	1	1	1	1	1	1	1	1	1	1	1	1	1	1	1	1	1	1	1	1	1	1	1	1	1	1	1	1	1	1	1	1	1	1	1	1	1	1	1
	1.4.10 Fraction of remaining natural gas reinjected			[-]	0	0.788379	0.742567	0.776819	0.497133	0.432477	0.444454	0.459985	0.458094	0.466343	0.490442	0.542361	0.549114	0.606445	0.628394	0.67717	0.700431	0.683779	0.699325	0.674133	0.575231	0.320201	0.0851543	0.0471705	0.0312638	0.0373313	0.03766	0.0514288	0.0799414	0.12363	0.123971	0.127127	0.125162	0.107614	0.114898	0.121264	0.121223	0.123481	0.123313
	1.4.11 Fraction of water produced that is reinjected			[-]	0	0.345554	0.201675	0.344923	0.210106	0.233938	0.537977	1	0.924119	1	1	1	1	0.745108	0.942548	1	0.763981	0.713128	0.770374	0.685142	0.73094	0.680758	0.77553	0.655242	0.642098	0.683536	0.619426	0.626761	0.578882	0.560682	0.500824	0.535235	0.597608	0.555925	0.485842	0.479146	0.528125	0.525482	0.585401
	1.4.12 Fraction of steam generation via cogeneration			[-]
1.5 Processing practices
	1.5.1 Heater/treater			NA	0	0	0	0	0	0	0	0	0	0	0	0	0	0	0	0	0	0	0	0	0	0	0	0	0	0	0	0	0	0	0	0	0	0	0	0	0	0	0
	1.5.2 Stabilizer column			NA	1	1	1	1	1	1	1	1	1	1	1	1	1	1	1	1	1	1	1	1	1	1	1	1	1	1	1	1	1	1	1	1	1	1	1	1	1	1	1
	1.5.3 Upgrader type				0	0	0	0	0	0	0	0	0	0	0	0	0	0	0	0	0	0	0	0	0	0	0	0	0	0	0	0	0	0	0	0	0	0	0	0	0	0	0
		0 = None
		1 = Delayed coking
		2 = Hydroconversion
		3 = Combined hydroconversion and fluid coking
	1.5.3 Associated Gas Processing Path			NA
		1= None
		2= Minimal: Dehydrator
		3= Acid Gas: Dehydrator + Amine Process
		4= Wet Gas: Dehydrator + Demethanizer
		5= Acid Wet Gas: Dehydrator + Amine Process + Demethanizer
		6= CO2-EOR Membrane: Dehydrator + Compressor + Membrane + Amine Process + Demethanizer
		7= CO2-EOR Ryan Holmes: Dehydrator + Ryan Holmes Process (Demethanizer Included)
		Notes: Choose paths 6 or 7 only if gas flooding is ON and CO2 is the flood gas
	1.5.4 Flaring-to-oil ratio			scf/bbl oil
	1.5.5 Venting-to-oil ratio			scf/bbl oil
	1.5.6 Volume fraction of diluent			[-]
1.6 Land use impacts
	1.6.1 Crude ecosystem carbon richness
		1.6.1.1 Low carbon richness (semi-arid grasslands)		NA
		1.6.1.2 Moderate carbon richness (mixed)		NA
		1.6.1.3 High carbon richness (forested)		NA
	1.6.2 Field development intensity
		1.6.2.1 Low intensity development and low oxidation		NA
		1.6.2.2 Moderate intensity development and moderate oxidation		NA
		1.6.2.3 High intensity development and high oxidation		NA
1.8 Crude oil transport
	1.8.1 Fraction of oil transported by each mode
		1.8.1.1 Ocean tanker		[-]	0	0	0	0	0	0	0	0	0	0	0	0	0	0	0	0	0	0	0	0	0	0	0	0	0	0	0	0	0	0	0	0	0	0	0	0	0	0	0
		1.8.1.2 Barge		[-]	0	0	0	0	0	0	0	0	0	0	0	0	0	0	0	0	0	0	0	0	0	0	0	0	0	0	0	0	0	0	0	0	0	0	0	0	0	0	0
		1.8.1.3 Pipeline		[-]	1	1	1	1	1	1	1	1	1	1	1	1	1	1	1	1	1	1	1	1	1	1	1	1	1	1	1	1	1	1	1	1	1	1	1	1	1	1	1
		1.8.1.4 Rail		[-]	0	0	0	0	0	0	0	0	0	0	0	0	0	0	0	0	0	0	0	0	0	0	0	0	0	0	0	0	0	0	0	0	0	0	0	0	0	0	0
		1.8.1.5 Truck			0	0	0	0	0	0	0	0	0	0	0	0	0	0	0	0	0	0	0	0	0	0	0	0	0	0	0	0	0	0	0	0	0	0	0	0	0	0	0
	1.8.2 Transport distance (one way)
		1.8.2.1 Ocean tanker		Mile	0	0	0	0	0	0	0	0	0	0	0	0	0	0	0	0	0	0	0	0	0	0	0	0	0	0	0	0	0	0	0	0	0	0	0	0	0	0	0
		1.8.2.2 Barge		Mile	0	0	0	0	0	0	0	0	0	0	0	0	0	0	0	0	0	0	0	0	0	0	0	0	0	0	0	0	0	0	0	0	0	0	0	0	0	0	0
		1.8.2.3 Pipeline		Mile	1670	1670	1670	1670	1670	1670	1670	1670	1670	1670	1670	1670	1670	1670	1670	1670	1670	1670	1670	1670	1670	1670	1670	1670	1670	1670	1670	1670	1670	1670	1670	1670	1670	1670	1670	1670	1670	1670	1670
		1.8.2.4 Rail		Mile	0	0	0	0	0	0	0	0	0	0	0	0	0	0	0	0	0	0	0	0	0	0	0	0	0	0	0	0	0	0	0	0	0	0	0	0	0	0	0
		1.8.2.5 Truck			0	0	0	0	0	0	0	0	0	0	0	0	0	0	0	0	0	0	0	0	0	0	0	0	0	0	0	0	0	0	0	0	0	0	0	0	0	0	0
	1.8.3 Ocean tanker size, if applicable			Ton
1.9 Small sources emissions				gCO2eq/MJ

## Sheet: Ekofisk
1 Inputs
Variables				Unit	Field 1	Field 2	Field 3	Field 4	Field 5	Field 6	Field 7	Field 8	Field 9	Field 10	Field 11	Field 12	Field 13	Field 14	Field 15	Field 16	Field 17	Field 18	Field 19	Field 20	Field 21	Field 22	Field 23	Field 24	Field 25	Field 26	Field 27	Field 28	Field 29	Field 30	Field 31	Field 32	Field 33	Field 34	Field 35	Field 36	Field 37	Field 38	Field 39	Field 40	Field 41	Field 42	Field 43	Field 44	Field 45
1.1 Production methods
Notes: Enter "1" where applicable and "0" where not applicable
	1.1.1 Downhole pump			NA	0	0	0	0	0	0	0	0	0	0	0	0	0	0	0	0	0	0	0	0	0	0	0	0	0	0	0	0	0	0	0	0	0	0	0	0	0	0	0	0	0	0	0	0	0
	1.1.2 Water reinjection			NA	0	0	0	0	0	0	0	0	0	0	0	0	0	0	0	0	0	1	0	0	0	0	0	0	0	0	0	0	0	0	0	0	0	0	0	0	0	0	0	0	0	0	0	0	0
	1.1.3 Natural gas reinjection			NA	1	1	1	1	1	1	1	1	1	1	1	1	1	1	1	1	1	1	1	1	1	1	1	1	1	0	0	0	0	0	0	0	0	0	0	0	0	0	0	0	0	0	0	0	0
	1.1.4 Water flooding			NA	0	0	0	0	0	0	0	0	0	0	0	0	0	0	1	1	1	0	0	1	1	1	1	1	1	1	1	1	1	1	1	1	1	1	1	1	1	1	1	1	1	1	1	1	1
	1.1.5 Gas lifting			NA	0	0	0	0	0	0	0	0	0	0	0	0	0	0	0	0	0	0	0	0	0	0	0	0	0	0	0	0	0	0	0	0	0	0	0	0	0	0	0	0	0	0	0	0	0
	1.1.6 Gas flooding			NA	0	0	0	0	0	0	0	0	0	0	0	0	0	0	0	0	0	0	0	0	0	0	0	0	0	0	0	0	0	0	0	0	0	0	0	0	0	0	0	0	0	0	0	0	0
	1.1.7 Steam flooding			NA	0	0	0	0	0	0	0	0	0	0	0	0	0	0	0	0	0	0	0	0	0	0	0	0	0	0	0	0	0	0	0	0	0	0	0	0	0	0	0	0	0	0	0	0	0
	1.1.8 Oil sands mine (integrated with upgrader)			NA	0	0	0	0	0	0	0	0	0	0	0	0	0	0	0	0	0	0	0	0	0	0	0	0	0	0	0	0	0	0	0	0	0	0	0	0	0	0	0	0	0	0	0	0	0
	1.1.9 Oil sands mine (non-integrated with upgrader)			NA	0	0	0	0	0	0	0	0	0	0	0	0	0	0	0	0	0	0	0	0	0	0	0	0	0	0	0	0	0	0	0	0	0	0	0	0	0	0	0	0	0	0	0	0	0
1.2 Field properties
	1.2.1 Field location (Country)			NA	Norway	Norway	Norway	Norway	Norway	Norway	Norway	Norway	Norway	Norway	Norway	Norway	Norway	Norway	Norway	Norway	Norway	Norway	Norway	Norway	Norway	Norway	Norway	Norway	Norway	Norway	Norway	Norway	Norway	Norway	Norway	Norway	Norway	Norway	Norway	Norway	Norway	Norway	Norway	Norway	Norway	Norway	Norway	Norway	Norway
	1.2.2 Field name			NA	Ekofisk 1971	Ekofisk 1972	Ekofisk 1973	Ekofisk 1974	Ekofisk 1975	Ekofisk 1976	Ekofisk 1977	Ekofisk 1978	Ekofisk 1979	Ekofisk 1980	Ekofisk 1981	Ekofisk 1982	Ekofisk 1983	Ekofisk 1984	Ekofisk 1985	Ekofisk 1986	Ekofisk 1987	Ekofisk 1988	Ekofisk 1989	Ekofisk 1990	Ekofisk 1991	Ekofisk 1992	Ekofisk 1993	Ekofisk 1994	Ekofisk 1995	Ekofisk 1996	Ekofisk 1997	Ekofisk 1998	Ekofisk 1999	Ekofisk 2000	Ekofisk 2001	Ekofisk 2002	Ekofisk 2003	Ekofisk 2004	Ekofisk 2005	Ekofisk 2006	Ekofisk 2007	Ekofisk 2008	Ekofisk 2009	Ekofisk 2010	Ekofisk 2011	Ekofisk 2012	Ekofisk 2013	Ekofisk 2014	Ekofisk 2015
	1.2.3 Field age			yr.	1	2	3	4	5	6	7	8	9	10	11	12	13	14	15	16	17	18	19	20	21	22	23	24	25	26	27	28	29	30	31	32	33	34	35	36	37	38	39	40	41	42	43	44	45
	1.2.4 Field depth			ft	10446.3	10446.3	10446.3	10446.3	10446.3	10446.3	10446.3	10446.3	10446.3	10446.3	10446.3	10446.3	10446.3	10446.3	10446.3	10446.3	10446.3	10446.3	10446.3	10446.3	10446.3	10446.3	10446.3	10446.3	10446.3	10446.3	10446.3	10446.3	10446.3	10446.3	10446.3	10446.3	10446.3	10446.3	10446.3	10446.3	10446.3	10446.3	10446.3	10446.3	10446.3	10446.3	10446.3	10446.3	10446.3
	1.2.5 Oil production volume			bbl/d	6153.99	33207.1	32216.2	34708.9	189475	279626	267005	267727	233015	207545	171868	157988	159993	147083	126900	96302.7	82281.5	110679	131546	146433	165487	170609	164642	186576	233724	244142	262493	258882	253280	288019	287525	299050	291993	276807	265885	266001	216126	198951	184603	153921	137820	123195	106985	113353	108023
	1.2.6 Number of producing wells			[-]	4	54	54	54	55.1375	56.348	57.5585	58.769	59.9795	61.19	62.4005	63.611	64.8215	66.032	67.2425	68.453	69.6635	70.874	72.0845	73.295	74.5055	75.716	76.9265	78.137	79.3475	80.558	81.7685	82.979	84.1895	85.4	86.6105	87.821	89.0315	90.242	91.4525	92.663	93.8735	95.084	96.2945	97.505	98.7155	99.926	100	100	100
	1.2.7 Number of water injecting wells			[-]	0	0	0	0	0	0	0	30	30	30	30	30	30	30	30	30	30	30	30	30	30	30	30	30	30	30	30	30	30	30	30	30	30	30	30	30	30	30	30	30	30	30	30	30	30
	1.2.8 Well diameter			in
	1.2.9 Productivity index			bbl/psi-d
	1.2.10 Reservoir pressure			psi	7060	7059.56	7018.13	6967.78	6911.69	6711.82	6482.76	6273.31	5928.99	5636.46	5397.88	5139.02	4923.92	4729.7	4545.64	4375.92	4292.55	4178.76	4089.07	4040.51	4026.22	3956.19	3906.44	3897.2	3967.81	4072.01	4181.27	4354.62	4454.36	4697.32	4778.06	4901.91	5004.31	5059.12	5103.72	5089.41	5089.13	5034.87	5035.17	5079.2	5114.97	5136.1	5136.1	5136.1	5136.1
	1.2.11 Reservoir temperature			◦F	268	268	268	268	268	268	268	268	268	268	268	268	268	268	268	268	268	268	268	268	268	268	268	268	268	268	268	268	268	268	268	268	268	268	268	268	268	268	268	268	268	268	268	268	268
	1.2.12 Offshore?			[0-1]	1	1	1	1	1	1	1	1	1	1	1	1	1	1	1	1	1	1	1	1	1	1	1	1	1	1	1	1	1	1	1	1	1	1	1	1	1	1	1	1	1	1	1	1	1
	1.2.13 New Wells Drilled (Producers or Injectors)			wells
1.3 Fluid properties
	1.3.1 API gravity			deg. API	36	36	36	36	36	36	36	36	36	36	36	36	36	36	36	36	36	36	36	36	36	36	36	36	36	36	36	36	36	36	36	36	36	36	36	36	36	36	36	36	36	36	36	36	36
	1.3.2 Gas composition
		N2		mol%	0.262052	0.262052	0.262052	0.262052	0.262052	0.262052	0.262052	0.262052	0.262052	0.262052	0.262052	0.262052	0.262052	0.262052	0.262052	0.262052	0.262052	0.262052	0.262052	0.262052	0.262052	0.262052	0.262052	0.262052	0.262052	0.262052	0.262052	0.262052	0.262052	0.262052	0.262052	0.262052	0.262052	0.262052	0.262052	0.262052	0.262052	0.262052	0.262052	0.262052	0.262052	0.262052	0.262052	0.262052	0.262052
		CO2		mol%	2.54289	2.54289	2.54289	2.54289	2.54289	2.54289	2.54289	2.54289	2.54289	2.54289	2.54289	2.54289	2.54289	2.54289	2.54289	2.54289	2.54289	2.54289	2.54289	2.54289	2.54289	2.54289	2.54289	2.54289	2.54289	2.54289	2.54289	2.54289	2.54289	2.54289	2.54289	2.54289	2.54289	2.54289	2.54289	2.54289	2.54289	2.54289	2.54289	2.54289	2.54289	2.54289	2.54289	2.54289	2.54289
		C1		mol%	78.7402	78.7402	78.7402	78.7402	78.7402	78.7402	78.7402	78.7402	78.7402	78.7402	78.7402	78.7402	78.7402	78.7402	78.7402	78.7402	78.7402	78.7402	78.7402	78.7402	78.7402	78.7402	78.7402	78.7402	78.7402	78.7402	78.7402	78.7402	78.7402	78.7402	78.7402	78.7402	78.7402	78.7402	78.7402	78.7402	78.7402	78.7402	78.7402	78.7402	78.7402	78.7402	78.7402	78.7402	78.7402
		C2		mol%	9.81255	9.81255	9.81255	9.81255	9.81255	9.81255	9.81255	9.81255	9.81255	9.81255	9.81255	9.81255	9.81255	9.81255	9.81255	9.81255	9.81255	9.81255	9.81255	9.81255	9.81255	9.81255	9.81255	9.81255	9.81255	9.81255	9.81255	9.81255	9.81255	9.81255	9.81255	9.81255	9.81255	9.81255	9.81255	9.81255	9.81255	9.81255	9.81255	9.81255	9.81255	9.81255	9.81255	9.81255	9.81255
		C3		mol%	4.30317	4.30317	4.30317	4.30317	4.30317	4.30317	4.30317	4.30317	4.30317	4.30317	4.30317	4.30317	4.30317	4.30317	4.30317	4.30317	4.30317	4.30317	4.30317	4.30317	4.30317	4.30317	4.30317	4.30317	4.30317	4.30317	4.30317	4.30317	4.30317	4.30317	4.30317	4.30317	4.30317	4.30317	4.30317	4.30317	4.30317	4.30317	4.30317	4.30317	4.30317	4.30317	4.30317	4.30317	4.30317
		C4+		mol%	3.3391	3.3391	3.3391	3.3391	3.3391	3.3391	3.3391	3.3391	3.3391	3.3391	3.3391	3.3391	3.3391	3.3391	3.3391	3.3391	3.3391	3.3391	3.3391	3.3391	3.3391	3.3391	3.3391	3.3391	3.3391	3.3391	3.3391	3.3391	3.3391	3.3391	3.3391	3.3391	3.3391	3.3391	3.3391	3.3391	3.3391	3.3391	3.3391	3.3391	3.3391	3.3391	3.3391	3.3391	3.3391
		H2S		mol%	1	1	1	1	1	1	1	1	1	1	1	1	1	1	1	1	1	1	1	1	1	1	1	1	1	1	1	1	1	1	1	1	1	1	1	1	1	1	1	1	1	1	1	1	1
1.4 Production practices
Notes: Enter "NA" where not applicable
	1.4.1 Gas-to-oil ratio (GOR)			scf/bbl oil	1618.55	1536.52	1564.95	1555.32	1520.87	1552.79	1826.17	2591.25	3226.64	3901.11	4475.97	4535.64	4898.78	5403.54	5960.88	5983.41	5856.6	5392.57	4789.39	4407.67	4418.66	4408.7	4006.43	3352.05	2857.42	2748.86	2016.91	1405.81	1027.06	1116.47	1090.65	1024.81	1039.29	1051.93	1086.64	1160	1281.62	1290.64	1255.38	1264.27	1157.16	1151.27	1058.46	1135.25	1195.07
	1.4.2 Water-to-oil ratio (WOR)			bbl water/bbl oil	0	0	0	0	0.0113893	0.0113866	0.0119024	0.0118367	0.0135656	0.0151871	0.0122769	0.0133048	0.0130756	0.0216816	0.0250591	0.00926246	0.0107436	0.0170312	0.0306964	0.0821056	0.115103	0.129143	0.138817	0.0907512	0.106249	0.212311	0.217913	0.223515	0.229118	0.23472	0.276616	0.323579	0.363177	0.43099	0.493563	0.528232	0.656262	0.786206	0.998108	1.28319	1.62545	1.90451	1.82136	1.88276	2.0002
	1.4.3 Water injection ratio			bbl water/bbl oil	0	0	0	0	0	0	0	0	0	0	0	0	0	0	0.116912	0.259251	0.303428	0.0116264	0	0.107089	0.503069	1.19572	1.83307	1.3185	1.55097	1.92634	2.59435	2.89823	2.83204	2.03797	1.97112	1.96329	1.75	1.66596	1.73742	1.59355	1.81204	2.16681	2.25946	2.6823	2.99527	3.19047	2.91439	3.3144	3.59294
	1.4.4 Gas lifting injection ratio			scf/bbl liquid
	1.4.5 Gas flooding injection ratio			scf/bbl oil
	1.4.6 Flood gas			NA
		1= Natural gas
		2= Nitrogen (N2)
		3= Carbon Dioxide (CO2)
		4= Air
		5= Oxygen (O2)
	1.4.7 Carbon dioxide flooding and sequestration parameters
		1.4.7.1 Percentage of newly acquired CO2 (total injected CO2 includes both new and recycled)		%
		1.4.7.2 Source of CO2		NA
			1= Natural subsurface reservoir
			2= Anthropogenic
		1.4.7.3 Percentage of sequestration credit assigned to the oilfield		%
	1.4.8 Steam-to-oil ratio (SOR)			bbl steam/bbl oil
	1.4.9 Fraction of required electricity generated onsite			[-]	1	1	1	1	1	1	1	1	1	1	1	1	1	1	1	1	1	1	1	1	1	1	1	1	1	1	1	1	1	1	1	1	1	1	1	1	1	1	1	1	1	1	1	1	1
	1.4.10 Fraction of remaining natural gas reinjected			[-]	0.25	0.25	0.25	0.25	0.25	0.25	0.25	0.25	0.25	0.25	0.25	0.25	0.25	0.25	0.25	0.25	0.25	0.25	0.25	0.25	0.25	0.25	0.25	0.25	0.25	0	0	0	0	0	0	0	0	0	0	0	0	0	0	0	0	0	0	0	0
	1.4.11 Fraction of water produced that is reinjected			[-]	0	0	0	0	0	0	0	0	0	0	0	0	0	0	1	1	1	0.682653	0	1	1	1	1	1	1	1	1	1	1	1	1	1	1	1	1	1	1	1	1	1	1	1	1	1	1
	1.4.12 Fraction of steam generation via cogeneration			[-]
1.5 Processing practices
	1.5.1 Heater/treater			NA	0	0	0	0	0	0	0	0	0	0	0	0	0	0	0	0	0	0	0	0	0	0	0	0	0	0	0	0	0	0	0	0	0	0	0	0	0	0	0	0	0	0	0	0	0
	1.5.2 Stabilizer column			NA	1	1	1	1	1	1	1	1	1	1	1	1	1	1	1	1	1	1	1	1	1	1	1	1	1	1	1	1	1	1	1	1	1	1	1	1	1	1	1	1	1	1	1	1	1
	1.5.3 Upgrader type				0	0	0	0	0	0	0	0	0	0	0	0	0	0	0	0	0	0	0	0	0	0	0	0	0	0	0	0	0	0	0	0	0	0	0	0	0	0	0	0	0	0	0	0	0
		0 = None
		1 = Delayed coking
		2 = Hydroconversion
		3 = Combined hydroconversion and fluid coking
	1.5.3 Associated Gas Processing Path			NA	5	5	5	5	5	5	5	5	5	5	5	5	5	5	5	5	5	5	5	5	5	5	5	5	5	5	5	5	5	5	5	5	5	5	5	5	5	5	5	5	5	5	5	5	5
		1= None
		2= Minimal: Dehydrator
		3= Acid Gas: Dehydrator + Amine Process
		4= Wet Gas: Dehydrator + Demethanizer
		5= Acid Wet Gas: Dehydrator + Amine Process + Demethanizer
		6= CO2-EOR Membrane: Dehydrator + Compressor + Membrane + Amine Process + Demethanizer
		7= CO2-EOR Ryan Holmes: Dehydrator + Ryan Holmes Process (Demethanizer Included)
		Notes: Choose paths 6 or 7 only if gas flooding is ON and CO2 is the flood gas
	1.5.4 Flaring-to-oil ratio			scf/bbl oil	9.60469	9.60469	9.60469	9.60469	9.60469	9.60469	9.60469	9.60469	9.60469	9.60469	9.60469	9.60469	9.60469	9.60469	9.60469	9.60469	9.60469	9.60469	9.60469	9.60469	9.60469	9.60469	9.60469	9.60469	9.60469	9.60469	9.60469	9.60469	9.60469	7.88753	4.50324	3.91911	4.76104	4.81368	6.6107	6.65375	6.08075	7.7285	7.9574	7.36619	7.9929	8.7559	10.1416	8.13324	9.92307
	1.5.5 Venting-to-oil ratio			scf/bbl oil
	1.5.6 Volume fraction of diluent			[-]
1.6 Land use impacts
	1.6.1 Crude ecosystem carbon richness
		1.6.1.1 Low carbon richness (semi-arid grasslands)		NA	1	1	1	1	1	1	1	1	1	1	1	1	1	1	1	1	1	1	1	1	1	1	1	1	1	1	1	1	1	1	1	1	1	1	1	1	1	1	1	1	1	1	1	1	1
		1.6.1.2 Moderate carbon richness (mixed)		NA	0	0	0	0	0	0	0	0	0	0	0	0	0	0	0	0	0	0	0	0	0	0	0	0	0	0	0	0	0	0	0	0	0	0	0	0	0	0	0	0	0	0	0	0	0
		1.6.1.3 High carbon richness (forested)		NA	0	0	0	0	0	0	0	0	0	0	0	0	0	0	0	0	0	0	0	0	0	0	0	0	0	0	0	0	0	0	0	0	0	0	0	0	0	0	0	0	0	0	0	0	0
	1.6.2 Field development intensity
		1.6.2.1 Low intensity development and low oxidation		NA	1	1	1	1	1	1	1	1	1	1	1	1	1	1	1	1	1	1	1	1	1	1	1	1	1	1	1	1	1	1	1	1	1	1	1	1	1	1	1	1	1	1	1	1	1
		1.6.2.2 Moderate intensity development and moderate oxidation		NA	0	0	0	0	0	0	0	0	0	0	0	0	0	0	0	0	0	0	0	0	0	0	0	0	0	0	0	0	0	0	0	0	0	0	0	0	0	0	0	0	0	0	0	0	0
		1.6.2.3 High intensity development and high oxidation		NA	0	0	0	0	0	0	0	0	0	0	0	0	0	0	0	0	0	0	0	0	0	0	0	0	0	0	0	0	0	0	0	0	0	0	0	0	0	0	0	0	0	0	0	0	0
1.8 Crude oil transport
	1.8.1 Fraction of oil transported by each mode
		1.8.1.1 Ocean tanker		[-]	1	1	1	1	1	1	1	1	1	1	1	1	1	1	1	1	1	1	1	1	1	1	1	1	1	1	1	1	1	1	1	1	1	1	1	1	1	1	1	1	1	1	1	1	1
		1.8.1.2 Barge		[-]	0	0	0	0	0	0	0	0	0	0	0	0	0	0	0	0	0	0	0	0	0	0	0	0	0	0	0	0	0	0	0	0	0	0	0	0	0	0	0	0	0	0	0	0	0
		1.8.1.3 Pipeline		[-]	0	0	0	0	0	0	0	0	0	0	0	0	0	0	0	0	0	0	0	0	0	0	0	0	0	0	0	0	0	0	0	0	0	0	0	0	0	0	0	0	0	0	0	0	0
		1.8.1.4 Rail		[-]	0	0	0	0	0	0	0	0	0	0	0	0	0	0	0	0	0	0	0	0	0	0	0	0	0	0	0	0	0	0	0	0	0	0	0	0	0	0	0	0	0	0	0	0	0
		1.8.1.5 Truck			0	0	0	0	0	0	0	0	0	0	0	0	0	0	0	0	0	0	0	0	0	0	0	0	0	0	0	0	0	0	0	0	0	0	0	0	0	0	0	0	0	0	0	0	0
	1.8.2 Transport distance (one way)
		1.8.2.1 Ocean tanker		Mile	4778	4778	4778	4778	4778	4778	4778	4778	4778	4778	4778	4778	4778	4778	4778	4778	4778	4778	4778	4778	4778	4778	4778	4778	4778	4778	4778	4778	4778	4778	4778	4778	4778	4778	4778	4778	4778	4778	4778	4778	4778	4778	4778	4778	4778
		1.8.2.2 Barge		Mile	0	0	0	0	0	0	0	0	0	0	0	0	0	0	0	0	0	0	0	0	0	0	0	0	0	0	0	0	0	0	0	0	0	0	0	0	0	0	0	0	0	0	0	0	0
		1.8.2.3 Pipeline		Mile	0	0	0	0	0	0	0	0	0	0	0	0	0	0	0	0	0	0	0	0	0	0	0	0	0	0	0	0	0	0	0	0	0	0	0	0	0	0	0	0	0	0	0	0	0
		1.8.2.4 Rail		Mile	0	0	0	0	0	0	0	0	0	0	0	0	0	0	0	0	0	0	0	0	0	0	0	0	0	0	0	0	0	0	0	0	0	0	0	0	0	0	0	0	0	0	0	0	0
		1.8.2.5 Truck			0	0	0	0	0	0	0	0	0	0	0	0	0	0	0	0	0	0	0	0	0	0	0	0	0	0	0	0	0	0	0	0	0	0	0	0	0	0	0	0	0	0	0	0	0
	1.8.3 Ocean tanker size, if applicable			Ton
1.9 Small sources emissions				gCO2eq/MJ

## Sheet: Forties - Free flow
1 Inputs
Variables				Unit	Field 1	Field 2	Field 3	Field 4	Field 5	Field 6	Field 7	Field 8	Field 9	Field 10	Field 11	Field 12	Field 13	Field 14	Field 15	Field 16	Field 17	Field 18	Field 19	Field 20	Field 21	Field 22	Field 23	Field 24	Field 25
1.1 Production methods
Notes: Enter "1" where applicable and "0" where not applicable
	1.1.1 Downhole pump			NA	0	0	0	0	0	0	0	0	0	0	0	0	0	0	0	0	0	0	0	0	0	0	0	0	0	0	0	0	0	0	0	0	0	0	0	0	0	0	0	0	0
	1.1.2 Water reinjection			NA	0	0	0	0	0	0	0	0	0	0	0	0	0	0	0	0	0	0	0	0	0	0	1	1	0	1	1	1	1	1	1	1	1	1	1	1	1	1	1	1	1
	1.1.3 Natural gas reinjection			NA	0	0	0	0	0	0	0	0	0	0	0	0	0	0	0	0	0	0	0	0	0	0	0	0	0	0	0	0	0	0	0	0	0	0	0	0	0	0	0	0	0
	1.1.4 Water flooding			NA	0	1	1	1	1	1	1	1	1	1	1	1	1	1	1	1	1	1	1	1	1	1	0	0	1	0	0	0	0	0	0	0	0	0	0	0	0	0	0	0	0
	1.1.5 Gas lifting			NA	0	0	0	0	0	0	0	0	0	0	0	0	0	0	0	0	0	0	0	0	0	0	0	0	0	0	0	0	0	0	0	0	0	0	0	0	0	0	0	0	0
	1.1.6 Gas flooding			NA	0	0	0	0	0	0	0	0	0	0	0	0	0	0	0	0	0	0	0	0	0	0	0	0	0	0	0	0	0	0	0	0	0	0	0	0	0	0	0	0	0
	1.1.7 Steam flooding			NA	0	0	0	0	0	0	0	0	0	0	0	0	0	0	0	0	0	0	0	0	0	0	0	0	0	0	0	0	0	0	0	0	0	0	0	0	0	0	0	0	0
	1.1.8 Oil sands mine (integrated with upgrader)			NA	0	0	0	0	0	0	0	0	0	0	0	0	0	0	0	0	0	0	0	0	0	0	0	0	0	0	0	0	0	0	0	0	0	0	0	0	0	0	0	0	0
	1.1.9 Oil sands mine (non-integrated with upgrader)			NA	0	0	0	0	0	0	0	0	0	0	0	0	0	0	0	0	0	0	0	0	0	0	0	0	0	0	0	0	0	0	0	0	0	0	0	0	0	0	0	0	0
1.2 Field properties
	1.2.1 Field location (Country)			NA	United Kingdom	United Kingdom	United Kingdom	United Kingdom	United Kingdom	United Kingdom	United Kingdom	United Kingdom	United Kingdom	United Kingdom	United Kingdom	United Kingdom	United Kingdom	United Kingdom	United Kingdom	United Kingdom	United Kingdom	United Kingdom	United Kingdom	United Kingdom	United Kingdom	United Kingdom	United Kingdom	United Kingdom	United Kingdom	United Kingdom	United Kingdom	United Kingdom	United Kingdom	United Kingdom	United Kingdom	United Kingdom	United Kingdom	United Kingdom	United Kingdom	United Kingdom	United Kingdom	United Kingdom	United Kingdom	United Kingdom	United Kingdom
	1.2.2 Field name			NA	Forties 1975	Forties 1976	Forties 1977	Forties 1978	Forties 1979	Forties 1980	Forties 1981	Forties 1982	Forties 1983	Forties 1984	Forties 1985	Forties 1986	Forties 1987	Forties 1988	Forties 1989	Forties 1990	Forties 1991	Forties 1992	Forties 1993	Forties 1994	Forties 1995	Forties 1996	Forties 1997	Forties 1998	Forties 1999	Forties 2000	Forties 2001	Forties 2002	Forties 2003	Forties 2004	Forties 2005	Forties 2006	Forties 2007	Forties 2008	Forties 2009	Forties 2010	Forties 2011	Forties 2012	Forties 2013	Forties 2014	Forties 2015
	1.2.3 Field age			yr.	1	2	3	4	5	6	7	8	9	10	11	12	13	14	15	16	17	18	19	20	21	22	23	24	25	26	27	28	29	30	31	32	33	34	35	36	37	38	39	40	41
	1.2.4 Field depth			ft	7000	7000	7000	7000	7000	7000	7000	7000	7000	7000	7000	7000	7000	7000	7000	7000	7000	7000	7000	7000	7000	7000	7000	7000	7000	7000	7000	7000	7000	7000	7000	7000	7000	7000	7000	7000	7000	7000	7000	7000	7000
	1.2.5 Oil production volume			bbl/d	12888.7	175685	413445	501576	502805	504482	467571	454819	445637	415425	377968	338141	326162	290658	209978	191558	167953	154592	120277	124523	108674	107662	85660.6	83240.3	67075	56541	58631.5	54237.9	41977.7	54996.7	67777	60590.8	54570.4	61853.8	63219	57423.8	54949	46410	41473.7	39975.5	43053.1
	1.2.6 Number of producing wells			[-]	3	24	35	38	43	49	59	61	62	60	58	59	69	68	60	56	54	56	59	55	62	60	64	61	58	58	58	58	58	58	58	58	58	58	58	58	58	58	58	58	58
	1.2.7 Number of water injecting wells			[-]	0	1	11	12	13	17	17	18	19	19	20	20	19	19	19	21	20	19	19	21	19	15	11	9	12	12	12	12	12	12	12	12	12	12	12	12	12	12	12	12	12
	1.2.8 Well diameter			in	4.5	4.5	4.5	4.5	4.5	4.5	4.5	4.5	4.5	4.5	4.5	4.5	4.5	4.5	4.5	4.5	4.5	4.5	4.5	4.5	4.5	4.5	4.5	4.5	4.5	4.5	4.5	4.5	4.5	4.5	4.5	4.5	4.5	4.5	4.5	4.5	4.5	4.5	4.5	4.5	4.5
	1.2.9 Productivity index			bbl/psi-d
	1.2.10 Reservoir pressure			psi	3176.04	3002	2706.58	2530.84	2511.01	2439.45	2445.56	2527.76	2535.37	2596.88	2662.16	2726.61	2771.05	2764.63	2969.21	2958.83	2976.21	2966.72	2932.47	2979.93	2934.04	2918.92	2832.31	2819.93	2820	2819.93	2819.86	2819.78	2819.71	2819.64	2819.57	2819.5	2819.42	2819.35	2819.28	2819.21	2819.14	2819.06	2818.99	2818.92	2818.85
	1.2.11 Reservoir temperature			◦F	195	195	195	195	195	195	195	195	195	195	195	195	195	195	195	195	195	195	195	195	195	195	195	195	195	195	195	195	195	195	195	195	195	195	195	195	195	195	195	195	195
	1.2.12 Offshore?			[0-1]	1	1	1	1	1	1	1	1	1	1	1	1	1	1	1	1	1	1	1	1	1	1	1	1	1	1	1	1	1	1	1	1	1	1	1	1	1	1	1	1	1
	1.2.13 New Wells Drilled (Producers or Injectors)			wells
1.3 Fluid properties
	1.3.1 API gravity			deg. API	37	37	37	37	37	37	37	37	37	37	37	37	37	37	37	37	37	37	37	37	37	37	37	37	37	37	37	37	37	37	37	37	37	37	37	37	37	37	37	37	37
	1.3.2 Gas composition
		N2		mol%	3.26	3.26	3.26	3.26	3.26	3.26	3.26	3.26	3.26	3.26	3.26	3.26	3.26	3.26	3.26	3.26	3.26	3.26	3.26	3.26	3.26	3.26	3.26	3.26	3.26	3.26	3.26	3.26	3.26	3.26	3.26	3.26	3.26	3.26	3.26	3.26	3.26	3.26	3.26	3.26	3.26
		CO2		mol%	19.42	19.42	19.42	19.42	19.42	19.42	19.42	19.42	19.42	19.42	19.42	19.42	19.42	19.42	19.42	19.42	19.42	19.42	19.42	19.42	19.42	19.42	19.42	19.42	19.42	19.42	19.42	19.42	19.42	19.42	19.42	19.42	19.42	19.42	19.42	19.42	19.42	19.42	19.42	19.42	19.42
		C1		mol%	49.39	49.39	49.39	49.39	49.39	49.39	49.39	49.39	49.39	49.39	49.39	49.39	49.39	49.39	49.39	49.39	49.39	49.39	49.39	49.39	49.39	49.39	49.39	49.39	49.39	49.39	49.39	49.39	49.39	49.39	49.39	49.39	49.39	49.39	49.39	49.39	49.39	49.39	49.39	49.39	49.39
		C2		mol%	8.04	8.04	8.04	8.04	8.04	8.04	8.04	8.04	8.04	8.04	8.04	8.04	8.04	8.04	8.04	8.04	8.04	8.04	8.04	8.04	8.04	8.04	8.04	8.04	8.04	8.04	8.04	8.04	8.04	8.04	8.04	8.04	8.04	8.04	8.04	8.04	8.04	8.04	8.04	8.04	8.04
		C3		mol%	8.83	8.83	8.83	8.83	8.83	8.83	8.83	8.83	8.83	8.83	8.83	8.83	8.83	8.83	8.83	8.83	8.83	8.83	8.83	8.83	8.83	8.83	8.83	8.83	8.83	8.83	8.83	8.83	8.83	8.83	8.83	8.83	8.83	8.83	8.83	8.83	8.83	8.83	8.83	8.83	8.83
		C4+		mol%	11.06	11.06	11.06	11.06	11.06	11.06	11.06	11.06	11.06	11.06	11.06	11.06	11.06	11.06	11.06	11.06	11.06	11.06	11.06	11.06	11.06	11.06	11.06	11.06	11.06	11.06	11.06	11.06	11.06	11.06	11.06	11.06	11.06	11.06	11.06	11.06	11.06	11.06	11.06	11.06	11.06
		H2S		mol%	0	0	0	0	0	0	0	0	0	0	0	0	0	0	0	0	0	0	0	0	0	0	0	0	0	0	0	0	0	0	0	0	0	0	0	0	0	0	0	0	0
1.4 Production practices
Notes: Enter "NA" where not applicable
	1.4.1 Gas-to-oil ratio (GOR)			scf/bbl oil	341.671	326.163	316.063	313.62	313.412	313.412	313.417	313.422	313.423	313.492	297.627	297.803	305.425	308.418	313.374	311.356	313.85	311.14	312.203	308.72	345.335	441.108	511.835	380.52	338.842	275.129	220.946	225.051	230.794	233.414	232.393	213.817	181.008	195.839	183.086	182.294	203.573	238.056	234.334	288.339	263.674
	1.4.2 Water-to-oil ratio (WOR)			bbl water/bbl oil	0	0.00130455	0.00142037	0.00377481	0.0181478	0.0407596	0.0815759	0.0931451	0.110999	0.101443	0.136688	0.179958	0.243944	0.34453	0.527558	0.669922	0.864464	1.17659	1.69065	1.71721	2.37559	2.66159	3.13767	3.16096	3.21771	3.6164	3.60598	4.04038	5.30838	4.88445	4.55507	4.63351	5.08538	5.52789	5.64298	6.63241	5.92185	8.6604	9.74464	10.2165	9.73513
	1.4.3 Water injection ratio			bbl water/bbl oil	0	0.0299163	0.267034	0.659586	0.702609	0.732317	0.955177	0.981342	1.03236	1.05278	1.06814	1.20727	1.14274	1.25686	1.92496	1.87394	1.80303	2.1286	2.46526	2.43659	2.88334	2.82278	2.73112	2.65797	3.38881	3.01755	2.64628	2.27501	1.90374	1.53247	1.1612	0.789929	0.41866	1.1065	1.16509	0.977041	0.977937	3.22188	2.62241	1.28778	1.28829
	1.4.4 Gas lifting injection ratio			scf/bbl liquid	0	0	0	0	0	0	0	0	0	0	0	0	0	0	6.23531	6.25221	6.38689	5.94383	6.18004	5.91096	5.45199	5.07337	5.64277	5.77434	6.46915	347.52	347.52	347.52	347.52	347.52	347.52	347.52	347.52	347.52	347.52	347.52	347.52	347.52	347.52	347.52	347.52
	1.4.5 Gas flooding injection ratio			scf/bbl oil
	1.4.6 Flood gas			NA
		1= Natural gas
		2= Nitrogen (N2)
		3= Carbon Dioxide (CO2)
		4= Air
		5= Oxygen (O2)
	1.4.7 Carbon dioxide flooding and sequestration parameters
		1.4.7.1 Percentage of newly acquired CO2 (total injected CO2 includes both new and recycled)		%
		1.4.7.2 Source of CO2		NA
			1= Natural subsurface reservoir
			2= Anthropogenic
		1.4.7.3 Percentage of sequestration credit assigned to the oilfield		%
	1.4.8 Steam-to-oil ratio (SOR)			bbl steam/bbl oil
	1.4.9 Fraction of required electricity generated onsite			[-]	1	1	1	1	1	1	1	1	1	1	1	1	1	1	1	1	1	1	1	1	1	1	1	1	1	1	1	1	1	1	1	1	1	1	1	1	1	1	1	1	1
	1.4.10 Fraction of remaining natural gas reinjected			[-]	0	0	0	0	0	0	0	0	0	0	0	0	0	0	0	0	0	0	0	0	0	0	0	0	0	0	0	0	0	0	0	0	0	0	0	0	0	0	0	0	0
	1.4.11 Fraction of water produced that is reinjected			[-]	0	1	1	1	1	1	1	1	1	1	1	1	1	1	1	1	1	1	1	1	1	1	0.870428	0.840874	1	0.834405	0.733857	0.563067	0.358629	0.313744	0.254925	0.170482	0.0823263	0.200167	0.206467	0.147313	0.16514	0.372024	0.269113	0.126049	0.132334
	1.4.12 Fraction of steam generation via cogeneration			[-]
1.5 Processing practices
	1.5.1 Heater/treater			NA	0	0	0	0	0	0	0	0	0	0	0	0	0	0	0	0	0	0	0	0	0	0	0	0	0	0	0	0	0	0	0	0	0	0	0	0	0	0	0	0	0
	1.5.2 Stabilizer column			NA	1	1	1	1	1	1	1	1	1	1	1	1	1	1	1	1	1	1	1	1	1	1	1	1	1	1	1	1	1	1	1	1	1	1	1	1	1	1	1	1	1
	1.5.3 Upgrader type				0	0	0	0	0	0	0	0	0	0	0	0	0	0	0	0	0	0	0	0	0	0	0	0	0	0	0	0	0	0	0	0	0	0	0	0	0	0	0	0	0
		0 = None
		1 = Delayed coking
		2 = Hydroconversion
		3 = Combined hydroconversion and fluid coking
	1.5.3 Associated Gas Processing Path			NA	5	5	5	5	5	5	5	5	5	5	5	5	5	5	5	5	5	5	5	5	5	5	5	5	5	5	5	5	5	5	5	5	5	5	5	5	5	5	5	5	5
		1= None
		2= Minimal: Dehydrator
		3= Acid Gas: Dehydrator + Amine Process
		4= Wet Gas: Dehydrator + Demethanizer
		5= Acid Wet Gas: Dehydrator + Amine Process + Demethanizer
		6= CO2-EOR Membrane: Dehydrator + Compressor + Membrane + Amine Process + Demethanizer
		7= CO2-EOR Ryan Holmes: Dehydrator + Ryan Holmes Process (Demethanizer Included)
		Notes: Choose paths 6 or 7 only if gas flooding is ON and CO2 is the flood gas
	1.5.4 Flaring-to-oil ratio			scf/bbl oil	481.395	444.384	410.218	378.679	349.565	322.689	297.879	274.977	253.836	234.32	216.305	199.675	184.323	170.151	157.07	144.993	133.846	123.555	114.056	105.287	97.192	89.7196	127.801	106.062	78.9743	87.4419	90.3474	91.155	75.7145	134.846	109.419	99.0826	58.2426	51.3844	50.2748	43.0488	32.134	30.4371	52.1174	72.8049	84.9956
	1.5.5 Venting-to-oil ratio			scf/bbl oil
	1.5.6 Volume fraction of diluent			[-]
1.6 Land use impacts
	1.6.1 Crude ecosystem carbon richness
		1.6.1.1 Low carbon richness (semi-arid grasslands)		NA	1	1	1	1	1	1	1	1	1	1	1	1	1	1	1	1	1	1	1	1	1	1	1	1	1	1	1	1	1	1	1	1	1	1	1	1	1	1	1	1	1
		1.6.1.2 Moderate carbon richness (mixed)		NA	0	0	0	0	0	0	0	0	0	0	0	0	0	0	0	0	0	0	0	0	0	0	0	0	0	0	0	0	0	0	0	0	0	0	0	0	0	0	0	0	0
		1.6.1.3 High carbon richness (forested)		NA	0	0	0	0	0	0	0	0	0	0	0	0	0	0	0	0	0	0	0	0	0	0	0	0	0	0	0	0	0	0	0	0	0	0	0	0	0	0	0	0	0
	1.6.2 Field development intensity
		1.6.2.1 Low intensity development and low oxidation		NA	1	1	1	1	1	1	1	1	1	1	1	1	1	1	1	1	1	1	1	1	1	1	1	1	1	1	1	1	1	1	1	1	1	1	1	1	1	1	1	1	1
		1.6.2.2 Moderate intensity development and moderate oxidation		NA	0	0	0	0	0	0	0	0	0	0	0	0	0	0	0	0	0	0	0	0	0	0	0	0	0	0	0	0	0	0	0	0	0	0	0	0	0	0	0	0	0
		1.6.2.3 High intensity development and high oxidation		NA	0	0	0	0	0	0	0	0	0	0	0	0	0	0	0	0	0	0	0	0	0	0	0	0	0	0	0	0	0	0	0	0	0	0	0	0	0	0	0	0	0
1.8 Crude oil transport
	1.8.1 Fraction of oil transported by each mode
		1.8.1.1 Ocean tanker		[-]	1	1	1	1	1	1	1	1	1	1	1	1	1	1	1	1	1	1	1	1	1	1	1	1	1	1	1	1	1	1	1	1	1	1	1	1	1	1	1	1	1
		1.8.1.2 Barge		[-]	0	0	0	0	0	0	0	0	0	0	0	0	0	0	0	0	0	0	0	0	0	0	0	0	0	0	0	0	0	0	0	0	0	0	0	0	0	0	0	0	0
		1.8.1.3 Pipeline		[-]	1	1	1	1	1	1	1	1	1	1	1	1	1	1	1	1	1	1	1	1	1	1	1	1	1	0	0	0	0	0	0	0	0	0	0	0	0	0	0	0	0
		1.8.1.4 Rail		[-]	0	0	0	0	0	0	0	0	0	0	0	0	0	0	0	0	0	0	0	0	0	0	0	0	0	0	0	0	0	0	0	0	0	0	0	0	0	0	0	0	0
		1.8.1.5 Truck			0	0	0	0	0	0	0	0	0	0	0	0	0	0	0	0	0	0	0	0	0	0	0	0	0
	1.8.2 Transport distance (one way)
		1.8.2.1 Ocean tanker		Mile	4942	4942	4942	4942	4942	4942	4942	4942	4942	4942	4942	4942	4942	4942	4942	4942	4942	4942	4942	4942	4942	4942	4942	4942	4942	4942	4942	4942	4942	4942	4942	4942	4942	4942	4942	4942	4942	4942	4942	4942	4942
		1.8.2.2 Barge		Mile	0	0	0	0	0	0	0	0	0	0	0	0	0	0	0	0	0	0	0	0	0	0	0	0	0	0	0	0	0	0	0	0	0	0	0	0	0	0	0	0	0
		1.8.2.3 Pipeline		Mile	220	220	220	220	220	220	220	220	220	220	220	220	220	220	220	220	220	220	220	220	220	220	220	220	220	220	220	220	220	220	220	220	220	220	220	220	220	220	220	220	220
		1.8.2.4 Rail		Mile	0	0	0	0	0	0	0	0	0	0	0	0	0	0	0	0	0	0	0	0	0	0	0	0	0	0	0	0	0	0	0	0	0	0	0	0	0	0	0	0	0
		1.8.2.5 Truck			0	0	0	0	0	0	0	0	0	0	0	0	0	0	0	0	0	0	0	0	0	0	0	0	0	0	0	0	0	0	0	0	0	0	0	0	0	0	0	0	0
	1.8.3 Ocean tanker size, if applicable			Ton
1.9 Small sources emissions				gCO2eq/MJ

## Sheet: Forties - Pump
1 Inputs
Variables				Unit	Field 1	Field 2	Field 3	Field 4	Field 5	Field 6	Field 7	Field 8	Field 9	Field 10	Field 11	Field 12
1.1 Production methods
Notes: Enter "1" where applicable and "0" where not applicable
	1.1.1 Downhole pump			NA	1	1	1	1	1	1	1	1	1	1	1	1	1	1	1	1	1	1	1	1	1	1	1	1	1	1	1	1
	1.1.2 Water reinjection			NA	0	0	0	0	0	0	0	0	0	1	1	0	1	1	1	1	1	1	1	1	1	1	1	1	1	1	1	1
	1.1.3 Natural gas reinjection			NA	0	0	0	0	0	0	0	0	0	0	0	0	0	0	0	0	0	0	0	0	0	0	0	0	0	0	0	0
	1.1.4 Water flooding			NA	1	1	1	1	1	1	1	1	1	0	0	1	0	0	0	0	0	0	0	0	0	0	0	0	0	0	0	0
	1.1.5 Gas lifting			NA	0	0	0	0	0	0	0	0	0	0	0	0	0	0	0	0	0	0	0	0	0	0	0	0	0	0	0	0
	1.1.6 Gas flooding			NA	0	0	0	0	0	0	0	0	0	0	0	0	0	0	0	0	0	0	0	0	0	0	0	0	0	0	0	0
	1.1.7 Steam flooding			NA	0	0	0	0	0	0	0	0	0	0	0	0	0	0	0	0	0	0	0	0	0	0	0	0	0	0	0	0
	1.1.8 Oil sands mine (integrated with upgrader)			NA	0	0	0	0	0	0	0	0	0	0	0	0	0	0	0	0	0	0	0	0	0	0	0	0	0	0	0	0
	1.1.9 Oil sands mine (non-integrated with upgrader)			NA	0	0	0	0	0	0	0	0	0	0	0	0	0	0	0	0	0	0	0	0	0	0	0	0	0	0	0	0
1.2 Field properties
	1.2.1 Field location (Country)			NA	United Kingdom	United Kingdom	United Kingdom	United Kingdom	United Kingdom	United Kingdom	United Kingdom	United Kingdom	United Kingdom	United Kingdom	United Kingdom	United Kingdom	United Kingdom	United Kingdom	United Kingdom	United Kingdom	United Kingdom	United Kingdom	United Kingdom	United Kingdom	United Kingdom	United Kingdom	United Kingdom	United Kingdom	United Kingdom	United Kingdom	United Kingdom	United Kingdom
	1.2.2 Field name			NA	Forties 1988	Forties 1989	Forties 1990	Forties 1991	Forties 1992	Forties 1993	Forties 1994	Forties 1995	Forties 1996	Forties 1997	Forties 1998	Forties 1999	Forties 2000	Forties 2001	Forties 2002	Forties 2003	Forties 2004	Forties 2005	Forties 2006	Forties 2007	Forties 2008	Forties 2009	Forties 2010	Forties 2011	Forties 2012	Forties 2013	Forties 2014	Forties 2015
	1.2.3 Field age			yr.	14	15	16	17	18	19	20	21	22	23	24	25	26	27	28	29	30	31	32	33	34	35	36	37	38	39	40	41
	1.2.4 Field depth			ft	7000	7000	7000	7000	7000	7000	7000	7000	7000	7000	7000	7000	7000	7000	7000	7000	7000	7000	7000	7000	7000	7000	7000	7000	7000	7000	7000	7000
	1.2.5 Oil production volume			bbl/d	290658	209978	191558	167953	154592	120277	124523	108674	107662	85660.6	83240.3	67075	56541	58631.5	54237.9	41977.7	54996.7	67777	60590.8	54570.4	61853.8	63219	57423.8	54949	46410	41473.7	39975.5	43053.1
	1.2.6 Number of producing wells			[-]	68	60	56	54	56	59	55	62	60	64	61	58	58	58	58	58	58	58	58	58	58	58	58	58	58	58	58	58
	1.2.7 Number of water injecting wells			[-]	19	19	21	20	19	19	21	19	15	11	9	12	12	12	12	12	12	12	12	12	12	12	12	12	12	12	12	12
	1.2.8 Well diameter			in	4.5	4.5	4.5	4.5	4.5	4.5	4.5	4.5	4.5	4.5	4.5	4.5	4.5	4.5	4.5	4.5	4.5	4.5	4.5	4.5	4.5	4.5	4.5	4.5	4.5	4.5	4.5	4.5
	1.2.9 Productivity index			bbl/psi-d
	1.2.10 Reservoir pressure			psi	2764.63	2969.21	2958.83	2976.21	2966.72	2932.47	2979.93	2934.04	2918.92	2832.31	2819.93	2820	2819.93	2819.86	2819.78	2819.71	2819.64	2819.57	2819.5	2819.42	2819.35	2819.28	2819.21	2819.14	2819.06	2818.99	2818.92	2818.85
	1.2.11 Reservoir temperature			◦F	195	195	195	195	195	195	195	195	195	195	195	195	195	195	195	195	195	195	195	195	195	195	195	195	195	195	195	195
	1.2.12 Offshore?			[0-1]	1	1	1	1	1	1	1	1	1	1	1	1	1	1	1	1	1	1	1	1	1	1	1	1	1	1	1	1
	1.2.13 New Wells Drilled (Producers or Injectors)			wells
1.3 Fluid properties
	1.3.1 API gravity			deg. API	37	37	37	37	37	37	37	37	37	37	37	37	37	37	37	37	37	37	37	37	37	37	37	37	37	37	37	37
	1.3.2 Gas composition
		N2		mol%	3.26	3.26	3.26	3.26	3.26	3.26	3.26	3.26	3.26	3.26	3.26	3.26	3.26	3.26	3.26	3.26	3.26	3.26	3.26	3.26	3.26	3.26	3.26	3.26	3.26	3.26	3.26	3.26
		CO2		mol%	19.42	19.42	19.42	19.42	19.42	19.42	19.42	19.42	19.42	19.42	19.42	19.42	19.42	19.42	19.42	19.42	19.42	19.42	19.42	19.42	19.42	19.42	19.42	19.42	19.42	19.42	19.42	19.42
		C1		mol%	49.39	49.39	49.39	49.39	49.39	49.39	49.39	49.39	49.39	49.39	49.39	49.39	49.39	49.39	49.39	49.39	49.39	49.39	49.39	49.39	49.39	49.39	49.39	49.39	49.39	49.39	49.39	49.39
		C2		mol%	8.04	8.04	8.04	8.04	8.04	8.04	8.04	8.04	8.04	8.04	8.04	8.04	8.04	8.04	8.04	8.04	8.04	8.04	8.04	8.04	8.04	8.04	8.04	8.04	8.04	8.04	8.04	8.04
		C3		mol%	8.83	8.83	8.83	8.83	8.83	8.83	8.83	8.83	8.83	8.83	8.83	8.83	8.83	8.83	8.83	8.83	8.83	8.83	8.83	8.83	8.83	8.83	8.83	8.83	8.83	8.83	8.83	8.83
		C4+		mol%	11.06	11.06	11.06	11.06	11.06	11.06	11.06	11.06	11.06	11.06	11.06	11.06	11.06	11.06	11.06	11.06	11.06	11.06	11.06	11.06	11.06	11.06	11.06	11.06	11.06	11.06	11.06	11.06
		H2S		mol%	0	0	0	0	0	0	0	0	0	0	0	0	0	0	0	0	0	0	0	0	0	0	0	0	0	0	0	0
1.4 Production practices
Notes: Enter "NA" where not applicable
	1.4.1 Gas-to-oil ratio (GOR)			scf/bbl oil	308.418	313.374	311.356	313.85	311.14	312.203	308.72	345.335	441.108	511.835	380.52	338.842	275.129	220.946	225.051	230.794	233.414	232.393	213.817	181.008	195.839	183.086	182.294	203.573	238.056	234.334	288.339	263.674
	1.4.2 Water-to-oil ratio (WOR)			bbl water/bbl oil	0.34453	0.527558	0.669922	0.864464	1.17659	1.69065	1.71721	2.37559	2.66159	3.13767	3.16096	3.21771	3.6164	3.60598	4.04038	5.30838	4.88445	4.55507	4.63351	5.08538	5.52789	5.64298	6.63241	5.92185	8.6604	9.74464	10.2165	9.73513
	1.4.3 Water injection ratio			bbl water/bbl oil	1.25686	1.92496	1.87394	1.80303	2.1286	2.46526	2.43659	2.88334	2.82278	2.73112	2.65797	3.38881	3.01755	2.64628	2.27501	1.90374	1.53247	1.1612	0.789929	0.41866	1.1065	1.16509	0.977041	0.977937	3.22188	2.62241	1.28778	1.28829
	1.4.4 Gas lifting injection ratio			scf/bbl liquid	0	374.118	350.124	344.892	332.854	364.622	325.103	338.024	304.402	361.137	352.235	375.21	347.52	347.52	347.52	347.52	347.52	347.52	347.52	347.52	347.52	347.52	347.52	347.52	347.52	347.52	347.52	347.52
	1.4.5 Gas flooding injection ratio			scf/bbl oil
	1.4.6 Flood gas			NA
		1= Natural gas
		2= Nitrogen (N2)
		3= Carbon Dioxide (CO2)
		4= Air
		5= Oxygen (O2)
	1.4.7 Carbon dioxide flooding and sequestration parameters
		1.4.7.1 Percentage of newly acquired CO2 (total injected CO2 includes both new and recycled)		%
		1.4.7.2 Source of CO2		NA
			1= Natural subsurface reservoir
			2= Anthropogenic
		1.4.7.3 Percentage of sequestration credit assigned to the oilfield		%
	1.4.8 Steam-to-oil ratio (SOR)			bbl steam/bbl oil
	1.4.9 Fraction of required electricity generated onsite			[-]	1	1	1	1	1	1	1	1	1	1	1	1	1	1	1	1	1	1	1	1	1	1	1	1	1	1	1	1
	1.4.10 Fraction of remaining natural gas reinjected			[-]	0	0	0	0	0	0	0	0	0	0	0	0	0	0	0	0	0	0	0	0	0	0	0	0	0	0	0	0
	1.4.11 Fraction of water produced that is reinjected			[-]	1	1	1	1	1	1	1	1	1	0.870428	0.840874	1	0.834405	0.733857	0.563067	0.358629	0.313744	0.254925	0.170482	0.0823263	0.200167	0.206467	0.147313	0.16514	0.372024	0.269113	0.126049	0.132334
	1.4.12 Fraction of steam generation via cogeneration			[-]
1.5 Processing practices
	1.5.1 Heater/treater			NA	0	0	0	0	0	0	0	0	0	0	0	0	0	0	0	0	0	0	0	0	0	0	0	0	0	0	0	0
	1.5.2 Stabilizer column			NA	1	1	1	1	1	1	1	1	1	1	1	1	1	1	1	1	1	1	1	1	1	1	1	1	1	1	1	1
	1.5.3 Upgrader type				0	0	0	0	0	0	0	0	0	0	0	0	0	0	0	0	0	0	0	0	0	0	0	0	0	0	0	0
		0 = None
		1 = Delayed coking
		2 = Hydroconversion
		3 = Combined hydroconversion and fluid coking
	1.5.3 Associated Gas Processing Path			NA	5	5	5	5	5	5	5	5	5	5	5	5	5	5	5	5	5	5	5	5	5	5	5	5	5	5	5	5
		1= None
		2= Minimal: Dehydrator
		3= Acid Gas: Dehydrator + Amine Process
		4= Wet Gas: Dehydrator + Demethanizer
		5= Acid Wet Gas: Dehydrator + Amine Process + Demethanizer
		6= CO2-EOR Membrane: Dehydrator + Compressor + Membrane + Amine Process + Demethanizer
		7= CO2-EOR Ryan Holmes: Dehydrator + Ryan Holmes Process (Demethanizer Included)
		Notes: Choose paths 6 or 7 only if gas flooding is ON and CO2 is the flood gas
	1.5.4 Flaring-to-oil ratio			scf/bbl oil	170.151	157.07	144.993	133.846	123.555	114.056	105.287	97.192	89.7196	127.801	106.062	78.9743	87.4419	90.3474	91.155	75.7145	134.846	109.419	99.0826	58.2426	51.3844	50.2748	43.0488	32.134	30.4371	52.1174	72.8049	84.9956
	1.5.5 Venting-to-oil ratio			scf/bbl oil
	1.5.6 Volume fraction of diluent			[-]
1.6 Land use impacts
	1.6.1 Crude ecosystem carbon richness
		1.6.1.1 Low carbon richness (semi-arid grasslands)		NA	1	1	1	1	1	1	1	1	1	1	1	1	1	1	1	1	1	1	1	1	1	1	1	1	1	1	1	1
		1.6.1.2 Moderate carbon richness (mixed)		NA	0	0	0	0	0	0	0	0	0	0	0	0	0	0	0	0	0	0	0	0	0	0	0	0	0	0	0	0
		1.6.1.3 High carbon richness (forested)		NA	0	0	0	0	0	0	0	0	0	0	0	0	0	0	0	0	0	0	0	0	0	0	0	0	0	0	0	0
	1.6.2 Field development intensity
		1.6.2.1 Low intensity development and low oxidation		NA	1	1	1	1	1	1	1	1	1	1	1	1	1	1	1	1	1	1	1	1	1	1	1	1	1	1	1	1
		1.6.2.2 Moderate intensity development and moderate oxidation		NA	0	0	0	0	0	0	0	0	0	0	0	0	0	0	0	0	0	0	0	0	0	0	0	0	0	0	0	0
		1.6.2.3 High intensity development and high oxidation		NA	0	0	0	0	0	0	0	0	0	0	0	0	0	0	0	0	0	0	0	0	0	0	0	0	0	0	0	0
1.8 Crude oil transport
	1.8.1 Fraction of oil transported by each mode
		1.8.1.1 Ocean tanker		[-]	1	1	1	1	1	1	1	1	1	1	1	1	1	1	1	1	1	1	1	1	1	1	1	1	1	1	1	1
		1.8.1.2 Barge		[-]	0	0	0	0	0	0	0	0	0	0	0	0	0	0	0	0	0	0	0	0	0	0	0	0	0	0	0	0
		1.8.1.3 Pipeline		[-]	0	0	0	0	0	0	0	0	0	0	0	0	0	0	0	0	0	0	0	0	0	0	0	0	0	0	0	0
		1.8.1.4 Rail		[-]	0	0	0	0	0	0	0	0	0	0	0	0	0	0	0	0	0	0	0	0	0	0	0	0	0	0	0	0
		1.8.1.5 Truck			0	0	0	0	0	0	0	0	0	0	0
	1.8.2 Transport distance (one way)
		1.8.2.1 Ocean tanker		Mile	4942	4942	4942	4942	4942	4942	4942	4942	4942	4942	4942	4942	4942	4942	4942	4942	4942	4942	4942	4942	4942	4942	4942	4942	4942	4942	4942	4942
		1.8.2.2 Barge		Mile	0	0	0	0	0	0	0	0	0	0	0	0	0	0	0	0	0	0	0	0	0	0	0	0	0	0	0	0
		1.8.2.3 Pipeline		Mile	220	220	220	220	220	220	220	220	220	220	220	220	220	220	220	220	220	220	220	220	220	220	220	220	220	220	220	220
		1.8.2.4 Rail		Mile	0	0	0	0	0	0	0	0	0	0	0	0	0	0	0	0	0	0	0	0	0	0	0	0	0	0	0	0
		1.8.2.5 Truck			0	0	0	0	0	0	0	0	0	0	0	0	0	0	0	0	0	0	0	0	0	0	0	0	0	0	0	0
	1.8.3 Ocean tanker size, if applicable			Ton
1.9 Small sources emissions				gCO2eq/MJ

[truncated: 26 more sheets: Forties - Gas lift, Forties - Weights, Gullfaks, HuntingtonBeach, Hibernia, Kingfish, Kern River, Midway-Sunset - Crude steam, Midway-Sunset - NG steam, Weights - Midway-Sunset, Ninian, Oseberg, Prudhoe - Free flow, Prudhoe - Gas lift, Prudhoe weights, Piper, SouthBelridge, Snorre, Spraberry Trend, Statfjord …]
