# Supplementary material for: Energetic productivity dynamics of global super-giant oilfields
Source: Royal Society of Chemistry journal article supplement (doi:10.1039/c7ee01031a), 2017-01-01
Supplement: c7ee01031a2.xlsx [file c7ee01031a2.xlsx]

## Sheet: NERs
Yearly global fields NER, MJ/MJ	Field Year	Agbami		Brent		Canterall		Coalinga		Elk Hills		Ekofisk		Forties		Gullfaks		Huntington Beach		Hibernia		Kingfish		Kern River		Midway-Sunset		Ninian		Oseberg		Purdhoe Bay		Piper		South Belridge		Spraberry Trend		Snorre		Statfjord		Terra Nova		Ventura		Valhall
		NERoil	NERtotal	NERoil	NERtotal	NERoil	NERtotal	NERoil	NERtotal	NERoil	NERtotal	NERoil	NERtotal	NERoil	NERtotal	NERoil	NERtotal	NERoil	NERtotal	NERoil	NERtotal	NERoil	NERtotal	NERoil	NERtotal	NERoil	NERtotal	NERoil	NERtotal	NERoil	NERtotal	NERoil	NERtotal	NERoil	NERtotal	NERoil	NERtotal	NERoil	NERtotal	NERoil	NERtotal	NERoil	NERtotal	NERoil	NERtotal	NERoil	NERtotal	NERoil	NERtotal
	1	16.3213	17.5332	19.1808	24.0487	56.2781	58.6808	7.72568	7.72658	38.8985	38.906	20.2623	25.5655	28.1926	28.2171	24.6014	24.8853	27.778	27.8867	39.4747	40.2276	14.5405	14.6603	6.33718	6.33801	11.745	12.52	30.2505	30.2596	22.8469	26.004	19.4728	19.7707	29.2308	29.2422	27.3989	27.4135	23.831	37.568	20.6092	21.2776	21.8906	25.6296	35.1153	36.4831	36.0652	38.1808	21.4755	25.4629
	2	22.146	22.436	16.5799	22.4504	54.9641	57.9627	9.4352	9.43629	41.1229	41.1284	20.9739	26.1892	28.3737	28.3984	17.0603	17.2854	28.4797	28.5786	17.2266	17.2857	14.5497	14.6695	7.3202	7.32115	12.0268	12.6525	29.6966	29.7042	20.5383	20.9912	19.0622	19.4186	26.7218	26.7322	5.13493	5.14156	23.8318	37.5685	19.3061	19.8375	21.5953	24.0454	30.8766	32.055	25.4681	26.5045	21.2031	25.3579
	3	22.0851	22.4366	16.6023	22.4911	55.0691	58.2121	6.93084	6.93165	40.4951	40.5481	20.8382	26.12	27.7215	27.7456	16.4684	16.7046	25.9369	26.0162	20.6189	21.5476	14.5583	14.6782	6.9147	6.9156	11.3289	11.8415	24.0653	24.0704	19.2391	19.6146	18.641	19.0557	27.7897	27.8005	4.73835	4.75823	24.0577	37.9252	20.7697	21.5085	17.5899	18.0392	29.9887	31.325	25.2772	26.4516	21.2738	25.3916
	4	21.5037	22.0044	17.0989	22.7407	53.8225	57.2872	4.08799	4.08847	39.6064	39.7151	20.8967	26.1596	26.1036	26.1263	17.3591	17.5986	23.056	23.1135	20.0111	20.7897	14.5792	14.6993	7.78376	7.78477	10.7549	11.1218	22.5282	22.5318	18.0719	18.4281	18.4006	18.8495	26.1636	26.1738	4.16044	4.19366	24.058	37.9256	19.9594	20.5829	17.6181	18.0704	29.4627	30.7003	24.1442	24.8597	21.8375	25.7142
	5	20.6531	21.3717	16.3288	19.7484	55.8116	58.8808	3.73787	3.73831	40.4267	40.5925	21.1747	26.3925	25.6915	25.7138	17.3356	17.5824	25.0025	25.0674	19.6868	20.499	14.6108	14.7312	5.43112	5.43182	10.6186	10.8333	21.7546	21.7567	17.2732	17.6216	17.8831	18.3979	26.7154	26.7258	3.97094	4.00797	24.0608	37.93	19.9934	20.5959	17.2247	17.672	31.3066	32.7555	24.1201	24.5693	22.3449	25.972
	6	18.8507	19.3649	16.0032	18.5076	56.1237	59.1471	3.61209	3.61251	40.3723	40.6619	21.1162	26.4391	26.0994	26.1221	16.5319	16.7766	26.2186	26.309	22.3065	23.0098	14.6526	14.7733	4.42258	4.42316	10.2843	10.4325	19.5449	19.5455	16.3662	16.6995	17.6385	18.19	26.1724	26.1826	4.17084	4.20524	24.0799	37.9609	19.7199	20.3437	16.7267	17.176	26.6591	27.7569	24.3409	24.6784	21.847	25.6194
	7	18.5395	19.3466	15.8588	19.6328	56.2066	59.2551	3.4058	3.4062	39.3245	39.7157	19.9993	25.9688	24.4273	24.4656	17.0425	17.297	26.507	26.6042	22.4666	23.1556	14.6588	14.7795	3.76243	3.76292	9.97857	10.0633	19.839	19.856	15.6296	15.9792	17.2952	17.856	25.4988	25.5088	3.99532	4.03665	24.0805	37.9619	18.9274	19.6718	19.9304	20.5008	24.2698	25.3734	24.4192	24.7627	21.4507	25.3765
	8	16.4141	17.4063	15.7429	19.9201	56.6091	59.6097	3.10379	3.10415	37.7751	38.3699	17.2665	24.6674	24.3923	24.501	15.4489	15.6777	23.0422	23.1417	22.1363	22.8366	14.6755	14.7964	3.81847	3.81897	9.19835	9.22004	19.1902	19.2051	14.7433	15.0718	16.3033	16.8861	25.2089	25.2187	4.13157	4.17963	24.0976	37.9895	19.0103	19.7875	20.7845	22.9877	21.5474	22.7157	24.3812	24.6665	21.297	25.2037
	9			15.8044	19.8171	54.7881	58.1005	2.97539	2.97573	37.0563	37.8646	15.6388	24.0308	24.1975	24.3698	14.4756	14.688	24.8038	24.9843	22.0068	22.7344	14.7041	14.8252	3.92715	3.92766	8.80231	8.81724	17.1411	17.1527	14.146	14.5185	16.1424	16.7504	24.8169	24.8266	4.2163	4.27046	24.1327	38.0462	18.3579	18.8541	20.3751	22.6314	18.8586	20.202	24.2936	24.5291	20.5729	24.7702
	10			15.5889	19.8762	54.5693	57.7152	2.71509	2.7154	36.5451	37.3594	14.1973	23.4418	23.2109	23.4334	14.5503	14.7786	24.8574	25.4222	21.4278	22.141	14.735	14.8563	3.36652	3.36696	8.63762	8.65185	14.0189	14.0277	13.2799	13.6377	15.1356	15.8547	24.5116	24.5211	4.55457	4.60834	24.1508	38.0754	19.8715	21.034	20.2888	22.4967	18.3451	20.2439	19.5068	19.6298	20.5436	24.7454
	11			14.9793	19.2753	52.3974	55.3995	2.89627	2.8966	35.3005	36.1538	13.1693	23.0303	23.6237	23.8566	14.9745	15.2237	30.1033	31.0685	21.3529	22.1187	14.738	14.8593	3.33018	3.33062	8.58485	8.60007	13.5792	13.9494	12.6423	13.0327	14.6039	15.4227	23.6786	23.6878	4.59741	4.65072	24.1328	38.0463	20.5635	21.6702	19.8731	21.9153	18.6049	20.7904	19.5395	19.6509	20.2755	24.5678
	12			14.5184	19.0931	52.9409	55.5195	2.94804	2.94838	34.0674	34.8648	13.0788	23.005	23.0305	23.3063	14.549	14.8071	28.9092	29.5102	19.6657	20.4757	14.7406	14.862	3.0537	3.0541	8.32966	8.34377	13.5887	13.9527	12.1553	12.6189	14.0165	14.8953	14.691	14.6967	4.61608	4.66125	24.1175	38.0216	19.2216	19.7749	19.899	21.7785	18.477	20.4428	23.848	23.992	20.272	24.5295
	13			13.9559	18.9738	52.9938	55.3198	2.64028	2.64059	32.8457	33.8126	12.5293	22.813	23.3012	23.6477	15.1038	15.3788	30.5446	31.3323	18.6022	19.4637	14.7379	14.8593	2.64421	2.64456	8.06597	8.07738	13.4564	13.8298	16.5951	17.3544	13.4355	14.3913	23.0894	24.1985	4.51601	4.55476	24.1332	38.047	18.2922	18.7585	20.4607	22.3026	17.5758	19.4878	23.6891	23.818	20.4729	24.5615
	14			12.9793	19.4002	51.2478	53.741	2.65361	2.65392	32.7194	33.6768	11.8209	22.5372	22.8041	23.1925	15.0267	15.324	30.2232	31.0954	19.9931	20.7872	14.7457	14.8671	3.20317	3.20359	8.60068	8.61259	11.8423	12.1883	14.7501	15.7095	12.3169	13.3845	23.405	24.6348	4.75149	4.79234	24.1521	38.0775	19.5675	20.5066	20.5039	22.3101	16.1158	18.1126	23.6979	23.8727	20.0495	24.2992
	15			11.6035	18.3478	50.8953	53.3656	2.5547	2.555	31.8823	32.8049	11.1238	22.2617	19.8187	20.2495	13.916	14.3794	29.3953	29.9439	19.8382	20.64	14.8048	14.9268	2.35293	2.35323	7.59007	7.59826	11.8919	12.2331	11.5768	12.7202	11.2807	12.447	23.7207	25.0711	4.35561	4.38966	24.1843	38.1296	19.0555	19.5794	20.4331	22.4377			23.4563	23.9099	20.2392	24.3285
	16			12.7175	18.9846	48.2265	51.3054	2.92808	2.92842	31.624	32.4416	11.0046	22.0557	20.3282	20.8481	11.3053	11.8729	30.7126	31.6043	19.7159	20.5769	14.773	14.8947	2.12394	2.12422	6.68705	6.6932	9.97382	10.2621	10.4894	13.1308	10.2236	11.5143	24.0364	25.5074	4.41641	4.44709	24.1848	38.1304	17.4545	17.9633	19.8981	22.0622			24.3557	24.8251	20.4943	24.3867
	17			12.5312	18.9501	49.3386	51.8311	3.08416	3.08452	30.7512	31.6484	11.1091	22.0213	19.9811	20.5792	10.4394	12.134	29.825	31.425	18.3583	19.2446	14.805	14.927	2.074	2.07427	6.76509	6.77065	9.53928	9.80853	10.0249	12.2572	9.17648	10.6279	24.352	25.9438	4.58474	4.61724	24.2171	38.1827	18.0961	18.7566	18.7771	20.959			24.0546	24.3554	21.0009	24.5625
	18			12.3448	18.9157	51.2872	53.6827	4.08037	4.08085	31.1231	32.0706	11.7977	22.4667	18.3842	18.991	10.7725	13.0078	29.4234	31.2907	17.6653	18.6048	14.8072	14.9292	2.24678	2.24708	6.11258	6.13454	9.11676	9.42238	9.62229	11.3648	8.08136	9.70639	24.6677	26.3801	4.63472	4.66696	24.2508	38.2372	18.3218	18.8994	17.6905	20.7787			23.8841	24.0161	20.7647	24.3961
	19			12.1584	18.8812	51.7156	54.0834	3.8056	3.80604	30.3586	31.3637	12.7111	22.9078	17.4061	18.0047	9.67737	11.5987	30.7675	32.4017	15.9513	16.9706	14.7851	14.9069	2.21468	2.21497	5.82588	5.8486	7.58729	7.8879	8.49566	11.4292	7.57347	9.29044	27.5667	29.5742	4.4417	4.47872	24.3159	38.3428	17.382	18.0117	16.7246	19.8973			24.5327	24.7764	19.319	23.6953
	20			12.3506	19.3862	52.6119	54.8321	3.81342	3.81387	29.1279	30.4256	13.3569	23.2077	17.7927	18.4009	9.07416	11.9184	31.4599	32.6206			14.7888	14.9107	2.19279	2.19308	5.71568	5.73602	9.17529	9.52562	7.69202	11.1339	6.94225	8.73148	21.275	22.7483	4.58175	4.6232	24.3158	38.3427	18.2484	18.9289	15.8315	18.9576			23.4593	23.9057	19.0279	23.5533
	21			12.4262	19.3062	53.4625	55.6639	4.21002	4.21051	28.7255	30.5703	13.3382	23.2004	16.2166	16.858	7.63848	10.6437	32.3152	33.2248			14.7902	14.912	2.12353	2.12381	5.78097	5.82072	8.81016	9.13202	6.80414	10.6035	6.38777	8.26799	19.5085	20.7396	4.47518	4.51866	24.2682	38.2654	16.6065	17.3123	14.234	17.9364			24.1268	24.7491	18.8469	23.4613
	22			10.1753	18.8914	44.3199	46.0902	3.72325	3.72369	27.3115	30.7586	12.958	22.4841	15.3839	16.1782	6.38211	9.59367	32.7239	33.1737			14.7927	14.9145	1.89176	1.89201	5.3179	5.35929	6.7957	7.02458	6.3372	8.86779	5.83125	7.77217	20.2875	21.9659	4.86623	4.91172	24.2832	38.2898	16.4217	17.073	8.7931	9.47396			24.7032	24.8409	18.6948	23.3868
	23			8.78157	17.6997	40.9865	42.4913	3.86645	3.8669	25.4898	30.9514	12.8845	21.4144	14.5721	15.4329	6.34815	9.90502	30.5215	31.2241			14.7916	14.9134	1.86397	1.86421	5.10518	5.15155	5.89003	6.02577	5.95253	10.3068	5.48806	7.4834	16.6576	17.9724	5.49235	5.54647	24.2832	38.2898	15.5515	16.2308	8.94666	9.69517			24.8103	24.971	19.2012	23.5897
	24			6.40415	16.0043	44.1585	45.8215	3.29905	3.29943	24.8445	30.6809	14.6339	22.7439	14.3793	15.0115	6.28724	8.79818	29.8398	30.5188			14.7832	14.905	2.10409	2.10436	3.91557	4.02711	6.04774	6.19634	6.11211	9.3598	5.26611	7.30035	16.8448	18.0179	6.08969	6.16103	24.3337	38.3716	15.3249	16.0221	8.95941	10.1142			23.8071	23.9714	19.286	23.6165
	25			5.07728	16.2008	43.6534	45.2989	3.8523	3.85275	25.5564	31.1342	14.9554	21.9323	14.4947	15.0751	6.72443	9.23971	27.3651	28.1178			14.8087	14.9307	2.4549	2.45522	3.32521	3.47789	5.33077	5.45448	5.91232	10.1796	4.8588	6.93611	15.1827	16.1774	6.74659	6.82847	24.3484	38.3955			7.88107	8.99892			23.2258	23.5872	19.2005	23.511
	26			3.96155	15.5745	42.7936	43.9247	3.09684	3.0972	26.3582	31.4449	14.3077	22.1514	15.7444	16.2461	6.23236	9.09688	27.4958	28.3132			14.789	14.9108	2.80854	2.8089	3.3164	3.46481	5.15434	5.26865	5.25695	8.05938	4.44508	6.53492	13.8612	14.9656	6.25961	6.3281	24.3486	38.3957			7.8711	9.71448			23.796	24.0894	19.4103	23.6179
	27			3.27238	15.1883	42.941	44.0125	2.67078	2.67109	27.0898	32.0878	12.564	17.3031	16.5018	16.9158	3.31283	3.43098	25.7647	26.6812			14.7765	14.8982	3.01507	3.01546	3.85478	3.96089	4.54937	4.71672	4.45624	9.97882	3.98212	6.08914	12.7742	13.753	6.49685	6.56012	24.3009	38.3186			7.2503	9.95865			23.9243	24.2833	19.4228	23.5816
	28			2.94083	14.7934	39.7349	40.7352	2.82251	2.82284	27.5299	32.2678	12.0905	14.9917	17.0221	17.4589	2.6598	2.76497	24.1591	25.2246			14.7769	14.8986	3.38184	3.38228	3.94384	4.05247	4.4095	4.54138	4.0853	8.85329			11.6085	12.225	6.60472	6.66687	24.334	38.372			7.02327	10.6148			23.5136	23.7671	19.8849	23.8606
	29			2.55106	14.46	31.7685	34.1705	2.63547	2.63578	27.0202	31.7652	13.1403	15.301	16.9959	17.4561	2.23115	2.35194	23.3708	23.955					3.55124	3.55171	3.86562	3.9729	4.73475	4.80862	3.888	6.89972			10.3549	10.8972	6.47414	6.53413	24.3015	38.3194			7.11478	11.3053			23.1535	23.4142	19.3974	23.6238
	30			2.52019	14.2817	22.6733	27.0574	2.58853	2.58883	26.0207	30.9538	16.2634	19.5274	17.2657	17.7059	2.63542	2.82943	23.3201	23.9332					3.58145	3.58192	3.62202	3.72224	4.32034	4.42341	3.81626	7.21167			10.8705	11.7631	5.84372	5.89906	24.3706	38.4284			7.96315	16.1545			23.5783	24.0816	19.5476	23.6732
	31			2.29373	14.1371	18.2322	22.0862	2.49648	2.49677	26.7339	31.5477	16.6919	19.9891	17.8875	18.3557			21.8841	22.4155					3.94389	3.94441	3.4324	3.5317	3.90388	4.0516					6.77774	7.39887	5.44084	5.49148	24.3528	38.3995			8.44578	19.0162			23.2845	24.011	19.7371	23.6892
	32			2.83383	14.3377	14.3512	15.4708	2.19721	2.19746	26.5066	31.2589	16.5951	19.6296	18.4686	18.9155			21.5748	22.1092					3.56935	3.56982	3.33468	3.42892	3.14293	3.26244					6.84302	7.07094	5.42616	5.47267	24.338	38.3756			8.36002	18.8389			22.9923	23.761	21.2264	24.459
	33			2.65473	14.2395	15.7257	16.8696	2.30641	2.30668	26.467	31.0662	17.9165	21.3741	18.521	18.9176			23.9441	24.5073					3.50004	3.5005	3.44634	3.54468	2.86984	2.98914					6.31841	6.51428	5.03576	5.0829	26.3259	39.738			11.2015	20.0844			21.893	22.8111	20.1131	23.9128
	34			3.23686	14.5075	11.7484	12.8051	2.34356	2.34384	24.9572	30.1625	18.6464	22.3008	17.361	17.7698			23.1515	23.3622					3.26361	3.26404	3.46641	3.56604	3.05365	3.22449					5.85528	6.00809	4.51476	4.56113	25.8462	39.4296			9.64872	19.4814			22.1835	23.1354	19.6027	23.6691
	35			3.31255	14.5357			2.48666	2.48695	26.7446	31.7307	18.345	22.0543	17.1896	17.5676			21.3845	21.5126					3.57208	3.57255	3.00417	3.09314	2.26456	2.37416					4.46134	4.55553	4.20972	4.25356	26.6117	39.9533			9.03434	19.0038			22.8575	23.7905
	36			4.02756	14.4206			2.30001	2.30028	26.909	31.8036	18.8432	22.9857	16.5802	16.9475			21.8319	21.9528					4.69951	4.70012	3.63468	3.72398	2.22836	2.33977					4.74194	4.83719	3.90219	3.94187	26.2583	39.73			7.29724	18.2391			22.5619	23.4225
	37			2.77964	13.3768			2.24606	2.24633	25.8984	31.1182	18.2616	22.73	17.2943	17.7279			21.4029	21.5116					4.08105	4.08158	3.08696	3.17676	2.36562	2.41988					4.20132	4.35252	3.80736	3.84237	26.7301	40.0869			5.86869	17.3397			22.3607	23.1532
	38			1.88161	13.3528			2.13001	2.13025	25.3512	30.7339	17.224	21.4028	12.7794	13.1578			21.1313	21.2253					3.88162	3.88212	2.82695	2.91609	2.03955	2.05725					2.09597	2.11491	3.73681	3.76915	26.2181	39.765							21.9054	22.6958
	39			3.33697	13.7788			2.34077	2.34104	24.671	30.2595	17.318	21.3912	13.0224	13.3952			19.1217	19.2666					3.68165	3.68213	2.75237	2.84027							2.80424	2.87886	3.41658	3.44564	26.1739	39.6888							21.4652	22.3279
	40			1.95486	11.9591							16.5959	20.4873	13.7305	14.2104									3.52299	3.52345	2.64548	2.73223							2.83597	2.91442			24.8034	38.7629
	41											16.354	19.7869	13.9719	14.4122									3.65048	3.65096	2.48728	2.5729											25.2834	39.0546
	42											16.2553	19.6371											3.9628	3.96332	2.41058	2.49281											25.1354	38.952
	43											17.7884	21.2275											4.34143	4.342	2.26923	2.35089											25.5774	39.2553
	44											16.2881	19.6241											3.97409	3.97461	2.27319	2.35512											24.7267	38.6821
	45											15.6456	19.0048											4.22683	4.22738													24.8016	38.7188
	46																							4.41247	4.41305													24.9643	38.8457
	47																							4.0699	4.07043													23.4855	37.8792
	48																							3.63182	3.6323													23.9914	38.2295
	49																							3.35782	3.35826													24.1151	38.3329
	50																							3.35294	3.35338													25.0821	39.0166
	51																																					22.8441	37.4823
	52																																					23.1825	37.6849
	53																																					22.9864	37.5475
	54																																					22.7549	37.3842
	55																																					22.6311	37.2973
	56																																					22.6965	37.3383
	57																																					23.2544	37.7192
	58																																					23.6111	37.9976
	59																																					24.3242	38.5174
	60																																					25.1768	39.1346
	61																																					30.1927	42.5601
	62																																					26.4853	40.1624
	63																																					27.7681	41.1427
	64																																					27.1082	40.9039
	65																																					24.0797	39.1031
	66																																					21.6071	37.5699
	67																																					19.55	36.2363
[truncated: 2 more columns]

## Sheet: EERs
Yearly global fields EER, MJ/MJ	Field Year	Agbami		Brent		Canterall		Coalinga		Elk Hills		Ekofisk		Forties		Gullfaks		Huntington Beach		Hibernia		Kingfish		Kern River		Midway-Sunset		Ninian		Oseberg		Purdhoe Bay		Piper		South Belridge		Spraberry Trend		Snorre		Statfjord		Terra Nova		Ventura		Valhall
		EERoil	EERtotal	EERoil	EERtotal	EERoil	EERtotal	EERoil	EERtotal	EERoil	EERtotal	EERoil	EERtotal	EERoil	EERtotal	EERoil	EERtotal	EERoil	EERtotal	EERoil	EERtotal	EERoil	EERtotal	EERoil	EERtotal	EERoil	EERtotal	EERoil	EERtotal	EERoil	EERtotal	EERoil	EERtotal	EERoil	EERtotal	EERoil	EERtotal	EERoil	EERtotal	EERoil	EERtotal	EERoil	EERtotal	EERoil	EERtotal	EERoil	EERtotal	EERoil	EERtotal
	1	30.8762	33.169	40.0938	50.2692	138.21	144.11	7.78245	7.78335	40.6078	40.6157	39.297	49.5822	28.6709	28.6959	32.3886	32.7624	73.6042	73.8922	62.7263	63.9227	14.5574	14.6773	47.6982	47.7044	42.5216	45.3274	30.6376	30.6468	37.9742	43.2217	24.8819	25.2625	30.0589	30.0706	28.3891	28.4042	232.001	365.733	35.5303	36.6827	38.3007	44.8425	58.6566	60.9413	112.453	119.05	38.293	45.4028
	2	31.2478	31.657	38.8038	52.5432	144.439	152.319	9.51948	9.52059	41.3988	41.4044	39.5807	49.4228	28.8593	28.8844	21.0721	21.3502	65.7223	65.9506	25.5929	25.6807	14.5682	14.6882	47.3161	47.3223	42.708	44.9299	30.0218	30.0296	20.5025	20.9547	25.0839	25.5529	27.4122	27.4229	5.28519	5.29202	232.001	365.725	37.0337	38.053	37.8391	42.1321	58.0277	60.2422	111.725	116.271	38.3742	45.8937
	3	31.4016	31.9013	39.2372	53.1546	148.262	156.723	6.97589	6.9767	43.8395	43.8969	39.5177	49.534	28.1938	28.2183	20.5782	20.8734	47.7536	47.8997	59.7422	62.4329	14.5794	14.6995	46.1191	46.1251	42.8119	44.749	19.515	19.5191	12.9841	13.2375	25.0452	25.6025	28.2783	28.2893	5.28319	5.30535	253.608	399.794	35.8343	37.1089	12.0439	12.3515	59.083	61.7158	111.348	116.521	38.4669	45.9125
	4	31.3588	32.0891	38.907	51.7445	149.127	158.727	4.10349	4.10397	45.806	45.9317	39.5542	49.5162	26.535	26.5581	21.7686	22.0689	34.6529	34.7392	34.347	35.6833	14.6003	14.7206	42.9463	42.9519	42.9176	44.3817	17.9512	17.954	10.576	10.7844	24.9983	25.6081	23.8829	23.8922	5.06557	5.10601	253.51	399.639	36.3299	37.4648	12.1631	12.4754	59.3704	61.8644	111.028	114.318	38.5786	45.4272
	5	31.3081	32.3975	38.8551	46.9923	150.686	158.972	3.75091	3.75135	75.6984	76.0088	39.4877	49.2181	26.1107	26.1334	21.9095	22.2213	40.1449	40.249	34.0118	35.415	14.632	14.7526	39.2442	39.2493	43.0368	43.9073	20.9379	20.9399	8.96849	9.14939	24.6226	25.3315	26.1997	26.2099	4.96557	5.01187	253.713	399.959	36.5441	37.6453	11.2655	11.558	59.3456	62.0923	110.922	112.987	38.6596	44.935
	6	28.6435	29.4249	38.7637	44.8301	151.211	159.357	3.62431	3.62473	119.238	120.093	39.3855	49.3137	26.5332	26.5563	20.8476	21.1561	54.7041	54.8928	39.7251	40.9776	14.6739	14.7948	38.6986	38.7036	43.1063	43.7277	19.5032	19.5038	7.54541	7.69906	24.9464	25.7264	25.9999	26.01	5.11812	5.16033	253.844	400.174	36.6849	37.8454	10.4134	10.6931	57.9791	60.3667	110.69	112.224	38.6186	45.2871
	7	31.1935	32.5516	38.7179	47.9316	152.458	160.727	3.41664	3.41704	119.09	120.274	39.0292	50.6788	25.1089	25.1483	21.723	22.0475	60.0487	60.2688	40.1523	41.3837	14.682	14.8029	37.7518	37.7567	43.1885	43.5551	20.3665	20.384	6.88414	7.03812	24.7791	25.5829	25.6788	25.6888	5.14959	5.20286	253.827	400.147	36.9217	38.3739	29.9181	30.7743	57.116	59.713	110.06	111.609	38.6006	45.665
	8	31.0292	32.9048	38.7457	49.0263	153.789	161.94	3.11294	3.11331	118.746	120.616	37.0078	52.8703	26.3702	26.4877	19.163	19.4468	53.697	53.929	35.9989	37.1378	14.6998	14.8209	36.7473	36.7521	41.4637	41.5615	19.6415	19.6567	5.78021	5.90903	24.4186	25.2918	23.7176	23.7268	5.59499	5.66006	254.072	400.54	36.6526	38.1511	36.8416	40.7468	56.7459	59.8225	109.71	110.994	38.6049	45.6866
	9			38.8346	48.6946	153.079	162.333	2.98392	2.98426	118.446	121.03	36.2972	55.7747	27.4437	27.639	17.6532	17.9122	131.763	132.722	38.1297	39.3903	14.729	14.8503	37.5799	37.5848	35.2752	35.335	17.4661	17.4779	5.5752	5.722	24.6953	25.6257	24.7434	24.7531	5.98519	6.06207	254.105	400.606	37.0922	38.0948	36.8223	40.9	56.0534	60.0465	109.574	110.636	38.5447	46.4088
	10			38.807	49.4798	153.755	162.614	2.72217	2.72249	118.383	121.021	35.565	58.7228	27.385	27.6476	18.0405	18.3236	131.54	134.529	34.0221	35.1545	14.7607	14.8822	35.6625	35.6671	34.8968	34.9543	14.2316	14.2405	4.7704	4.89892	24.0502	25.1933	23.987	23.9964	6.43961	6.51564	254.097	400.601	36.9265	39.0867	36.8702	40.8827	56.1812	61.9959	64.5241	64.9309	38.5598	46.4466
	11			38.6251	49.7028	153.802	162.607	2.90469	2.90503	118.163	121.019	34.9762	61.1657	28.1069	28.3839	18.982	19.2978	131.607	135.827	40.8357	42.3003	14.764	14.8856	35.6614	35.666	35.458	35.5208	26.0303	26.74	4.46893	4.60695	24.2381	25.5974	20.9185	20.9266	6.47518	6.55027	254.122	400.633	36.9133	38.8997	36.8928	40.684	56.4151	63.0423	53.275	53.5788	38.5395	46.6984
	12			38.4688	50.5902	154.43	161.944	2.95674	2.95708	117.933	120.693	34.9378	61.4537	28.3908	28.7308	18.623	18.9534	131.799	134.539	35.3782	36.8354	14.767	14.8886	37.4122	37.4171	34.7284	34.7872	27.8374	28.5831	4.49666	4.66819	23.6223	25.104	5.05945	5.06142	6.11053	6.17033	254.18	400.719	36.8743	37.9358	36.9779	40.4705	56.357	62.353	108.151	108.804	38.5569	46.6544
	13			37.9292	51.5671	154.617	161.399	2.64726	2.64756	117.539	120.999	34.5675	62.9395	30.5311	30.9851	19.6957	20.0543	131.436	134.825	32.7432	34.2596	14.7644	14.886	35.2868	35.2914	32.3974	32.4432	28.3421	29.1286	18.9207	19.7865	23.9761	25.6823	40.8253	42.7863	5.70692	5.75588	254.22	400.788	26.4693	27.144	37.0712	40.4084	56.3696	62.5021	88.163	88.6425	38.5947	46.3024
	14			37.567	56.1516	154.37	161.878	2.66073	2.66104	117.285	120.717	34.068	64.9529	31.0473	31.5761	20.0902	20.4878	131.399	135.191	31.4972	32.7482	14.7726	14.8942	36.7211	36.7259	32.1928	32.2373	23.1048	23.7799	23.9195	25.4754	23.5688	25.613	0	0	6.09337	6.14576	254.204	400.771	36.9945	38.77	37.1297	40.4004	55.4102	62.2756	107.348	108.14	38.5309	46.6979
	15			36.9214	58.3815	154.719	162.226	2.56112	2.56142	117.156	120.546	33.5343	67.1114	26.0828	26.6392	22.8826	23.6445	131.475	133.929	30.3498	31.5765	14.8322	14.9544	34.1828	34.1873	30.3903	30.4231	22.9278	23.5858	16.8207	18.482	23.7535	26.2111	0	0	5.3305	5.37218	254.209	400.793	33.5978	34.5215	37.1946	40.8436			107.345	109.421	38.5617	46.353
	16			37.371	55.787	153.992	163.833	2.93652	2.93686	116.979	120.003	33.5447	67.2315	26.6287	27.2919	19.0252	19.9804	130.957	134.759	34.6958	36.211	14.8006	14.9225	32.9824	32.9867	29.4278	29.4548	16.8241	17.3104	35.4843	44.4199	23.5682	26.5444	0	0	5.28188	5.31857	254.215	400.802	24.1995	24.9049	37.259	41.3113			107.477	109.548	38.5765	45.9031
	17			37.4148	56.6043	154.945	162.773	3.09376	3.09412	116.535	119.935	33.6915	66.7856	25.6892	26.441	37.1238	43.15	130.125	137.106	30.7636	32.2488	14.8327	14.9549	22.1454	22.1483	28.7447	28.7683	15.4039	15.8387	35.3746	43.2516	23.3818	27.0816	0	0	5.54787	5.5872	254.204	400.8	36.7975	38.1406	37.283	41.6153			107.354	108.696	38.6419	45.1952
	18			37.4587	57.4216	154.676	161.9	4.09728	4.09775	116.596	120.145	34.1576	65.0471	22.5159	23.2517	37.1608	44.8717	129.736	137.97	32.0829	33.7891	14.835	14.9572	12.7581	12.7598	20.5208	20.5945	16.0506	16.5887	35.2372	41.6184	22.2414	26.7164	39.6397	42.3914	5.59765	5.63658	254.219	400.839	36.7458	37.9043	37.2273	43.7258			95.1641	95.6901	38.6296	45.3852
	19			37.5025	58.2389	154.555	161.631	3.82048	3.82092	116.268	120.117	34.789	62.6966	21.4438	22.1742	36.7892	44.0934	130.024	136.93	29.7985	31.7025	14.8131	14.9351	2.21825	2.21854	19.68	19.7568	13.1897	13.7123	34.7312	46.7239	23.0599	28.2909	40.9138	43.8932	5.54672	5.59296	254.214	400.859	27.0823	28.0634	37.0775	44.1113			107.351	108.417	38.4867	47.2051
	20			37.4652	58.8077	154.686	161.213	3.82882	3.82927	115.678	120.831	35.2033	61.1659	22.4823	23.2449	36.3508	47.7448	130.524	135.34			14.8169	14.939	2.19629	2.19658	19.7636	19.8339	18.1629	18.8564	34.3308	49.6923	19.797	24.9024	40.4625	43.2647	5.90244	5.95584	254.216	400.862	36.6774	38.0451	37.089	44.4128			108.184	110.243	38.4572	47.6035
	21			37.3633	58.0505	154.422	160.78	4.22905	4.22954	115.431	122.844	35.1919	61.2126	21.7126	22.566	36.0254	50.1989	130.856	134.54			14.8183	14.9404	2.12682	2.12709	14.0105	14.1068	16.1626	16.7531	33.7612	52.6131	19.9386	25.8111	40.5411	43.0994	5.85205	5.90891	254.205	400.824	24.9131	25.972	36.8682	46.458			107.488	110.26	38.4407	47.8525
	22			35.741	66.3567	152.923	159.031	3.73813	3.73857	114.682	129.156	35.2129	61.1	24.9109	26.1923	35.1076	52.7742	131.203	133.006			14.8209	14.943	1.89437	1.89462	12.7601	12.8594	10.0633	10.4022	33.4641	46.8271	19.6932	26.2523	40.2374	43.5662	6.4528	6.51312	254.215	400.846	18.17	18.8906	36.2364	39.0423			108.257	108.86	38.379	48.0114
	23			34.609	69.7563	151.817	157.391	3.88335	3.8838	113.516	137.839	35.6721	59.2882	23.3689	24.738	35.2972	55.0742	131.075	134.092			14.8199	14.9419	1.8665	1.86675	11.4238	11.5276	7.3139	7.48245	33.1197	57.3464	19.7503	26.9363	40.1707	43.3414	7.77222	7.84881	254.209	400.838	16.3231	17.0361	36.245	39.2774			108.078	108.778	38.4475	47.2347
	24			31.8763	79.6607	152.22	157.953	3.31147	3.31186	113.234	139.835	36.4245	56.6106	19.076	19.9095	35.2179	49.2828	130.897	133.876			14.8116	14.9336	2.10731	2.10759	3.97302	4.0862	7.6811	7.86983	33.2844	50.9702	19.7531	27.3887	40.2552	43.0587	9.95971	10.0764	254.205	400.853	17.102	17.88	36.5677	41.2808			107.824	108.568	38.4514	47.0852
	25			29.5642	94.3346	151.898	157.624	3.86933	3.86978	113.81	138.65	37.0006	54.2619	19.2648	20.0325	35.3982	48.6389	130.74	134.336			14.8371	14.9593	2.45929	2.45961	3.38593	3.5414	6.48526	6.63577	33.0698	56.9384	19.5202	27.8714	40.2256	42.861	12.1939	12.3418	254.205	400.861			36.5074	41.6856			107.582	109.256	38.4463	47.0775
	26			26.9609	105.995	151.802	155.815	3.1077	3.10806	114.446	136.531	37.1312	57.4871	18.8377	19.4337	34.6953	50.642	130.72	134.605			14.8175	14.9395	2.81429	2.81466	3.38301	3.5344	6.17234	6.30922	32.485	49.8025	18.4854	27.1824	40.1527	43.3519	9.98466	10.0939	254.222	400.888			36.3263	44.8338			107.618	108.944	38.4603	46.7974
	27			24.876	115.459	151.958	155.75	2.67898	2.67929	114.67	135.826	38.047	52.398	18.0935	18.5434	0.629566	0.652018	130.33	134.966			14.805	14.927	3.0217	3.0221	3.90512	4.01261	5.98007	6.20004	31.3896	70.2905	17.0167	26.0274	40.124	43.1986	9.8988	9.99519	254.231	400.88			36.1814	49.697			107.608	109.223	38.4583	46.693
	28			23.8313	119.88	151.841	155.663	2.83206	2.83239	114.944	134.726	38.8575	48.1815	18.7819	19.2594	0.483327	0.502438	129.91	135.639			14.8055	14.9275	3.38742	3.38786	3.99258	4.10255	5.44181	5.60456	30.8388	66.8311			40.197	42.3316	9.96535	10.0591	254.245	400.917			36.1066	54.5708			107.12	108.275	38.483	46.1771
	29			22.313	126.475	148.745	159.991	2.64403	2.64434	114.708	134.852	39.3845	45.8607	19.6523	20.1805	0.407385	0.429439	130.404	133.664					3.56045	3.56091	3.91043	4.01896	5.3112	5.39405	30.5497	54.2142			40.112	42.2127	9.59867	9.68762	254.248	400.907			35.97	57.156			106.339	107.537	38.4207	46.7921
	30			22.2831	126.276	143.183	170.869	2.5968	2.59711	114.061	135.685	39.2553	47.1335	17.2742	17.7067	0.542028	0.581931	130.239	133.663					3.59081	3.59128	3.66343	3.7648	5.07963	5.20081	30.4384	57.5201			39.9364	43.2157	8.35532	8.43444	262.054	413.216			35.4469	71.9097			106.288	108.557	38.4424	46.556
	31			21.2324	130.863	139.68	169.207	2.50417	2.50446	114.349	134.938	39.2956	47.0579	19.046	19.5384			130.158	133.319					3.95524	3.95576	3.46529	3.56553	4.95436	5.14183					39.6277	43.2593	7.5047	7.57454	262.065	413.225			35.1572	79.1585			106.001	109.308	38.4811	46.1865
	32			23.6439	119.626	112.802	121.602	2.20318	2.20343	114.349	134.85	39.3872	46.5895	19.6529	20.1227			130.016	133.236					2.38477	2.38508	3.36221	3.45723	3.79935	3.94382					15.4611	15.9761	7.25063	7.31277	262.066	413.219			35.1363	79.178			105.507	109.035	38.5995	44.4778
	33			22.9056	122.862	121.784	130.643	2.31269	2.31296	114.502	134.399	39.3665	46.9638	20.8635	21.3078			129.822	132.876					3.50898	3.50944	3.47691	3.57612	3.46833	3.6125					12.1329	12.509	6.76895	6.83231	262.063	395.575			36.2937	65.0748			104.109	108.475	38.5005	45.774
	34			25.1207	112.59	110.366	120.293	2.35003	2.3503	113.604	137.297	39.3771	47.0944	20.2311	20.7058			130.193	131.378					3.26437	3.2648	3.50097	3.60159	4.04253	4.26869					9.36888	9.6134	6.0411	6.10314	262.078	399.813			35.7632	72.2082			103.183	107.61	38.4508	46.427
	35			25.3649	111.303			2.49391	2.4942	112.485	133.456	39.3434	47.2985	19.6261	20.0561			84.0209	84.5238					3.58139	3.58186	3.02653	3.11616	2.69329	2.82363					5.81046	5.93313	5.53237	5.58997	262.078	393.468			35.5251	74.7272			103.455	107.678
	36			27.539	98.6028			2.30585	2.30612	112.58	133.057	39.2519	47.881	19.1418	19.5648			73.565	73.9721					4.71564	4.71625	3.67397	3.76423	2.65838	2.7913					6.19639	6.32086	4.97988	5.03051	262.075	396.531			34.5849	86.4433			102.882	106.806
	37			23.5142	113.16			2.25147	2.25173	112.22	134.838	39.1169	48.6882	21.6073	22.1483			58.6468	58.9447					4.09321	4.09374	3.119	3.20974	2.57647	2.63557					6.67351	6.91369	4.70311	4.74635	262.08	393.039			33.4614	98.8656			102.29	105.915
	38			19.1393	135.822			2.13521	2.13546	112.067	135.862	39.1187	48.6096	15.6692	16.1328			47.1686	47.3785					3.89261	3.89312	2.85856	2.9487	2.10439	2.12265					2.20522	2.22515	4.53282	4.57205	262.078	397.493							102.559	106.26
	39			25.4863	105.237			2.34692	2.34719	111.312	136.527	39.1748	48.3888	15.1704	15.6039			116.907	117.794					3.69154	3.69202	2.7868	2.8758							3.43828	3.52976	4.05678	4.09129	262.079	397.404							101.296	105.367
	40			19.6845	120.422							39.1801	48.3669	16.5494	17.1261									3.52977	3.53023	2.68202	2.76997							3.5173	3.6146			262.071	409.566
	41											39.3332	47.5897	15.878	16.3761									3.66016	3.66064	2.52222	2.60904											262.066	404.806
	42											39.3549	47.5423											3.97426	3.97478	2.44461	2.52801											262.071	406.128
	43											39.5021	47.139											4.3552	4.35576	2.30665	2.38966											262.07	402.216
	44											39.3862	47.4528											3.98562	3.98614	2.33537	2.41954											262.07	409.98
	45											39.3086	47.7482											4.23594	4.23649													262.066	409.123
	46																							4.42669	4.42726													262.066	407.788
	47																							4.08199	4.08252													262.067	422.68
	48																							3.64145	3.64192													262.072	417.602
	49																							3.36605	3.36649													262.072	416.584
	50																							3.36115	3.36158													262.073	407.669
	51																																					262.082	430.02
	52																																					262.079	426.031
	53																																					262.078	428.095
	54																																					262.079	430.572
	55																																					262.08	431.921
	56																																					262.083	431.155
	57																																					262.079	425.099
	58																																					262.074	421.758
	59																																					262.078	415
	60																																					262.073	407.364
	61																																					262.07	369.418
	62																																					262.073	397.41
	63																																					254.252	376.714
	64																																					254.249	383.639
	65																																					254.244	412.868
	66																																					254.239	442.065
	67																																					254.235	471.23
[truncated: 2 more columns]
